# Supplementary material for: Gap Detection for Genome-Scale Constraint-Based Models
Source: PubMed Central journal article supplement (PMC3444828; doi:10.1155/2012/323472), 2012-09-10
Supplement: 323472.f2.pdf [file 323472.f2.pdf]

# Supplementary Material

March 6, 2012

## List of Tables

|    |                                                                                                 |    |
|----|-------------------------------------------------------------------------------------------------|----|
| S8 | Reactions in Final Working Model for <i>C. neoformans</i> . . . . .                             | 2  |
| S1 | Low-Cost Exchange Reactions . . . . .                                                           | 22 |
| S2 | Results of First Round of FBA-Gap . . . . .                                                     | 23 |
| S3 | Metabolites that are distance $\infty$ from biomass reaction for <i>C. neoformans</i> . . . . . | 24 |
| S4 | Round 1 of Gap Analysis for <i>C. neoformans</i> . . . . .                                      | 25 |
| S5 | Round 2 of Gap Analysis for <i>C. neoformans</i> . . . . .                                      | 25 |
| S6 | Round 3 of Gap Analysis for <i>C. neoformans</i> . . . . .                                      | 26 |
| S7 | Round 4 of Gap Analysis for <i>C. neoformans</i> . . . . .                                      | 26 |

Results from the first round of FBA-Gap for *B. subtilis*, *T. cruzi*, *H. pylori*, *E. coli*, and *C. neoformans* are in Table S2.

For the *C. neoformans* model, the first step of FBA-Gap yields that the metabolites in Table S3 are an infinite distance from the biomass reaction. The results of three rounds of gap analysis are in Tables S4-S6 below. Each table contains the transport reactions selected, and the action taken to avoid high-cost transports in the next round of gap analysis. In general, reactions are added only if they are in the MetModel GUI database and if KEGG specifies that a gene encodes the appropriate enzyme in the organism. The reactions in the final working model for *C. neoformans* is in Table S8.

Table S8: Reactions in Final Working Model for *C. neoformans*

| Pathway                          | EC #     | Reaction Code  | Reversible | Reaction Name                                                      | Reaction                                                        |
|----------------------------------|----------|----------------|------------|--------------------------------------------------------------------|-----------------------------------------------------------------|
| -                                | .        | R_HCO3En       | true       | HCO <sub>3</sub> equilibriumreaction, nuclear                      | [n] : co2 + h2o <=> h + hco3                                    |
| Alanine and Aspartate Metabolism | 2.1.1.10 | R_HCYSMT       | false      | homocysteineS-methyltransferase                                    | [c] : amet + hcys_l → ahcys + h + met_l                         |
| Alanine and Aspartate Metabolism | 2.3.1.7  | R_CSNATirm     | false      | carnitineO-acetyltransferase, reversedi-<br>rection, mitochondrial | [m] : accoa + crn → acrn + coa                                  |
| Alanine and Aspartate Metabolism | 2.3.1.7  | R_CSNATifm     | false      | carnitineO-acetyltransferase, forwardreaction, mitochondrial       | [m] : acrn + coa → accoa + crn                                  |
| Alanine and Aspartate Metabolism | 6.1.1.12 | R_ASPTRS       | false      | Aspartyl-tRNA synthetase                                           | [c] : asp_l + atp + trnaasp → amp + asptrna + ppi               |
| Alanine and Aspartate Metabolism | 6.1.1.12 | R_ASPTRSm      | false      | Aspartyl-tRNA synthetase, mitochondrial                            | [m] : asp_l + atp + trnaasp → amp + asptrna + ppi               |
| Alanine and Aspartate Metabolism | 2.6.1.1  | R_ASPTAp       | true       | aspartatetransaminase, peroxisomal                                 | [x] : akgl + asp_l <=> glu_l + oaa                              |
| Alanine and Aspartate Metabolism | 2.6.1.1  | R_ASPTA        | true       | aspartatetransaminase                                              | [c] : akgl + asp_l <=> glu_l + oaa                              |
| Alanine and Aspartate Metabolism | 2.6.1.1  | R_ASPTAm       | true       | aspartatetransaminase                                              | [m] : akgl + asp_l <=> glu_l + oaa                              |
| Alanine and Aspartate Metabolism | 2.7.2.4  | R_ASPKi        | false      | aspartatekinase, irreversible                                      | [c] : asp_l + atp → 4pasp + adp                                 |
| Alanine and Aspartate Metabolism | 6.3.5.4  | R_ASNS1        | false      | asparaginesynthase (glutamine-hydrolysing)                         | [c] : asp_l + atp + gln_l + h2o → amp + asn_l + glu_l + h + ppi |
| Alanine and Aspartate Metabolism | 1.2.1.11 | R_ASADi        | false      | aspartate-semialdehydedehydrogenase, irreversible                  | [c] : 4pasp + h + nadph → aspsa + nadp + pi                     |
| Alanine and Aspartate Metabolism | 6.1.1.7  | R_ALATRS       | false      | Alanyl-tRNA synthetase                                             | [c] : ala_l + atp + trnaala → alatrna + amp + ppi               |
| Alanine and Aspartate Metabolism | 2.6.1.2  | R_ALATA_Lm     | true       | L-alaninetransaminase, mitochondrial                               | [m] : akgl + ala_l <=> glu_l + pyr                              |
| Alanine and Aspartate Metabolism | 2.6.1.2  | R_ALATA_L      | true       | L-alaninetransaminase                                              | [c] : akgl + ala_l <=> glu_l + pyr                              |
| Starch and Sucrose Metabolism    | 3.2.1.28 | R_TREH         | false      | alpha, alpha-trehalase                                             | [c] : h2o + tre → 2.0 glc_d                                     |
| Alternate Carbon Metabolism      | 2.4.1.15 | R_TRE6PS       | false      | alpha, alpha-trehalose--phosphatesynthase (UDP-forming)            | [c] : g6p + udpg → h + tre6p + udp                              |
| Alternate Carbon Metabolism      | 2.4.1.15 | R_TRE6PP       | false      | trehalose-phosphatase                                              | [c] : h2o + tre6p → pi + tre                                    |
| Galactose metabolism             | 3.2.1.26 | R_SUCRe        | false      | sucrosehydrolyzingenzyme, extracellular                            | [e] : h2o + suc → fru + glc_d                                   |
| Fructose and Mannose Metabolism  | 1.1.1.2  | R_SBTR         | false      | D-sorbitolreductase                                                | [c] : glc_d + h + nadph → nadp + sbt_d                          |
| Alternate Carbon Metabolism      | 1.1.1.14 | R_SBTDL        | false      | L-sorbitoldehydrogenase (L-sorbose-producing)                      | [c] : nad + sbt_l → h + nadh + srb_l                            |
| Fructose and Mannose Metabolism  | 1.1.1.14 | R_SBTDD2       | false      | D-sorbitoldehydrogenase (D-fructoseproducing)                      | [c] : nad + sbt_d → fru + h + nadh                              |
| Pyruvate Metabolism              | 4.4.1.5  | R_LGTHL        | false      | lactoylglutathionelyase                                            | [c] : gthrd + mthgx_l → lgt_s                                   |
| Alternate Carbon Metabolism      | 1.1.2.3  | R_L_DASH_LACDm | false      | L-Lactatedehydrogenase, mitochondrial                              | [m] : 2.0 ficyc + lac_l → focyc + pyr                           |
| Pyruvate Metabolism              | 3.1.2.6  | R_GLYOXm       | false      | hydroxyacylglutathionehydrolyase, mitochondrial                    | [m] : h2o + lgt_s → gthrd + h + lac_d                           |
| Pyruvate Metabolism              | 3.1.2.6  | R_GLYOX        | false      | hydroxyacylglutathionehydrolyase                                   | [c] : h2o + lgt_s → gthrd + h + lac_d                           |
| Alternate Carbon Metabolism      | 2.4.1.11 | R_GLYGS        | false      | glycogen (starch)synthase                                          | [c] : h2o + udpg → 14glun + h + udp                             |
| Alternate Carbon Metabolism      | 2.4.1.11 | R_GLCS2        | false      | glycogensynthase (UDPGlc)                                          | [c] : udpg → glycogen + h + udp                                 |
| Alternate Carbon Metabolism      | 2.4.1.1  | R_GLCP         | false      | glycogenphosphorylase                                              | [c] : glycogen + pi → g1p                                       |
| Alternate Carbon Metabolism      | 2.4.1.18 | R_GBEZ         | false      | -1, 4-alpha-glucanbranchingenzyme                                  | [c] : 14glun → glycogen + h2o                                   |

|                                          |           |                |       |                                                                           |                                                   |
|------------------------------------------|-----------|----------------|-------|---------------------------------------------------------------------------|---------------------------------------------------|
| Alternate Carbon Metabolism              | 1.1.2.4   | R_D_DASH_LACDm | false | D-lactatede-hydrogenase, mitochondrial                                    | [m] : 2.0 ficytc + lac.d → focytc + pyr           |
| Alternate Carbon Metabolism              | 2.4.1.34  | R_13GS         | false | -1, 3-beta-glucansynthase                                                 | [c] : udpg → 13bdglen + h + udp                   |
| Aminosugar Metabolism                    | 3.5.1.41  | R_CHTNDA       | false | chitindeacetylase                                                         | [c] : chitin + h2o → ac + chitos + h              |
| Anaplerotic reactions                    | 4.1.1.49  | R_PPCK         | false | phosphoenolpyruvate-carboxykinase                                         | [c] : atp + oaa → adp + co2 + pep                 |
| Anaplerotic reactions                    | 6.4.1.1   | R_PC           | false | pyruvatecarboxylase                                                       | [c] : atp + hco3 + pyr → adp + h + oaa + pi       |
| Pyruvate Metabolism                      | 1.1.1.40  | R_ME2m         | false | malicenzyme (NADP), mitochondrial                                         | [m] : mal.l + nadp → co2 + nadph + pyr            |
| Pyruvate Metabolism                      | 1.1.1.38  | R_ME1m         | false | malicenzyme (NAD), mitochondrial                                          | [m] : mal.l + nad → co2 + nadh + pyr              |
| Anaplerotic reactions                    | 4.1.3.2   | R_MALSp        | false | malatesynthase                                                            | [x] : accoa + glx + h2o → coa + h + mal.l         |
| Glycolysis/Gluconeogenesis               | 2.7.1.11  | R_FBP          | false | fructose-bisphosphatase                                                   | [c] : fdp + h2o → f6p + pi                        |
| Pentose and Glucuronate Interconversions | 1.1.1.2   | R_ARABR        | false | arabinoserectase                                                          | [c] : arab.l + h + nadph → abt + nadp             |
| Arabinose Metabolism                     | 1.1.1.116 | R_ARAB1D2      | false | D-arabinose1-dehydrogenase (NADP)                                         | [c] : arab.d + nadp → dara14lac + h + nadph       |
| Arabinose Metabolism                     | 1.1.1.116 | R_ARAB1D1      | false | D-arabinose1-dehydrogenase (NAD)                                          | [c] : arab.d + nad → dara14lac + h + nadh         |
| Urea cycle/amino group metabolism        | 2.5.1.16  | R_SPMS         | false | spermidinesynthase                                                        | [c] : ametam + ptrc → 5mta + h + spmd             |
| Arginine and Proline Metabolism          | 6.1.1.15  | R_PROTRS       | false | Prolyl-tRNA synthetase                                                    | [c] : atp + pro.l + trnapro → amp + ppi + protrna |
| Arginine and Proline Metabolism          | .         | R_PRO1xm       | false | prolineoxidase (NAD), mitochondrial                                       | [m] : nad + pro.l → 1pyr5c + h + nadh             |
| Arginine and Proline Metabolism          | 1.5.1.12  | R_PHCDm        | false | L-1-pyrroline-3-hydroxy-5-carboxylatede-hydrogenase                       | [m] : 1p3h5c + 2.0 h2o + nad → e4hglu + h + nadh  |
| Urea cycle/amino group metabolism        | 1.5.1.2   | R_P5CR         | false | pyrroline-5-carboxylate-reductase                                         | [c] : 1pyr5c + 2.0 h + nadph → nadp + pro.l       |
| Arginine and Proline Metabolism          | 2.3.1.35  | R_ORNTACim     | false | ornithinetransacetylase, irreversible, mitochondrial                      | [m] : acorn + glu.l → acglu + orn                 |
| Arginine and Proline Metabolism          | 2.6.1.13  | R_ORNTA        | false | ornithinetransaminase                                                     | [c] : akg + orn → glu.l + glu5sa                  |
| Urea cycle/amino group metabolism        | 4.1.1.17  | R_ORNDC        | false | OrnithineDecarboxylase                                                    | [c] : h + orn → co2 + ptrc                        |
| Arginine and Proline Metabolism          | 2.1.3.3   | R_OCBTi        | false | ornithinecarbamoyl-transferase, irreversible                              | [c] : cbp + orn → citr.l + h + pi                 |
| Arginine and Proline Metabolism          | 1.5.1.12  | R_HPROym       | false | L-hydroxyprolinede-hydrogenase (NADP), mitochondrial                      | [m] : 4hpro.lt + nadp → 1p3h5c + h + nadph        |
| Arginine and Proline Metabolism          | 1.5.1.12  | R_HPROxm       | false | L-hydroxyprolinede-hydrogenase (NAD), mitochondrial                       | [m] : 4hpro.lt + nad → 1p3h5c + h + nadh          |
| Arginine and Proline Metabolism          | 1.5.1.2   | R_HPROa        | false | L-hydroxyproline-reductase (NAD)                                          | [c] : 1p3h5c + 2.0 h + nadh → 4hpro.lt + nad      |
| Arginine and Proline Metabolism          | 1.5.1.2   | R_HPROb        | false | L-hydroxyproline-reductase (NADP)                                         | [c] : 1p3h5c + 2.0 h + nadph → 4hpro.lt + nadp    |
| Arginine and Proline Metabolism          | 2.7.2.11  | R_GLU5K        | false | glutamate5-kinase                                                         | [c] : atp + glu.l → adp + glu5p                   |
| Arginine and Proline Metabolism          | 1.2.1.41  | R_G5SD         | false | glutamate-5-semialdehydede-hydrogenase                                    | [c] : glu5p + h + nadph → glu5sa + nadp + pi      |
| Arginine and Proline Metabolism          | 1.2.1.41  | R_G5SD2        | false | glutamate-5-semialdehydede-hydrogenase                                    | [c] : glu5p + h + nadh → glu5sa + nad + pi        |
| Arginine and Proline Metabolism          | .         | R_G5SADr       | true  | L-glutamate5-semialdehydedehydratase, reversible                          | [c] : glu5sa <=> 1pyr5c + h + h2o                 |
| Arginine and Proline Metabolism          | .         | R_G5SADrm      | true  | L-glutamate5-semialdehydedehydratase, reversible, mitochondrial           | [m] : glu5sa <=> 1pyr5c + h + h2o                 |
| Arginine and Proline Metabolism          | 2.6.1.1   | R_EHGLATp      | false | L-erythro-4-Hydroxyglutamate:2-oxoglutarateamino-transferase, peroxisomal | [x] : akg + e4hglu → 4h2oglt + glu.l              |

|                                   |          |             |       |                                                                             |                                                                                |
|-----------------------------------|----------|-------------|-------|-----------------------------------------------------------------------------|--------------------------------------------------------------------------------|
| Arginine and Proline Metabolism   | 2.6.1.1  | R_EHGLAT    | false | L-erythro-4-Hydroxyglutamate:2-oxoglutarateamino-transferase                | [c] : $akg + e4hglu \rightarrow 4h2oglt + glu\_l$                              |
| Arginine and Proline Metabolism   | 2.6.1.1  | R_EHGLATm   | false | L-erythro-4-Hydroxyglutamate:2-oxoglutarateamino-transferase, mitochondrial | [m] : $akg + e4hglu \rightarrow 4h2oglt + glu\_l$                              |
| Pyrimidine Biosynthesis           | 3.5.2.3  | R_CBPS      | false | carbamoyl-phosphate-synthase (glutamine-hydrolysing)                        | [c] : $2.0\ atp + gln\_l + h2o + hco3 \rightarrow adp + cbp + glu\_l + h + pi$ |
| Arginine and Proline Metabolism   | 6.3.5.5  | R_CBPSn     | false | carbamoyl-phosphate-synthase (glutamine-hydrolysing), nuclear               | [n] : $2.0\ atp + gln\_l + h2o + hco3 \rightarrow adp + cbp + glu\_l + h + pi$ |
| Arginine and Proline Metabolism   | 6.1.1.19 | R_ARGTRS    | false | Arginyl-tRNA synthetase                                                     | [c] : $arg\_l + atp + trnaarg \rightarrow amp + argtrna + ppi$                 |
| Arginine and Proline Metabolism   | 6.1.1.19 | R_ARGTRSm   | false | Arginyl-tRNA synthetase, mitochondrial                                      | [m] : $arg\_l + atp + trnaarg \rightarrow amp + argtrna + ppi$                 |
| Arginine and Proline Metabolism   | 6.3.4.5  | R_ARGSSr    | true  | argininosuccinatesynthase, reversible                                       | [c] : $asp\_l + atp + citr\_l \rightleftharpoons amp + argsuc + h + ppi$       |
| Alanine and Aspartate Metabolism  | 4.3.2.1  | R_ARGSL     | true  | argininosuccinatelyase                                                      | [c] : $argsuc \rightleftharpoons arg\_l + fum$                                 |
| Urea cycle/amino group metabolism | 3.5.3.1  | R_ARGN      | false | arginase                                                                    | [c] : $arg\_l + h2o \rightarrow orn + urea$                                    |
| Arginine and Proline Metabolism   | 3.5.1.4  | R_AMID      | false | amidase                                                                     | [c] : $4gudbd + h2o \rightarrow 4gudbutn + nh4$                                |
| Urea cycle/amino group metabolism | 1.2.1.38 | R_AGPRim    | false | N-acetyl-g-glutamyl-phosphatereductase, irreversible, mitochondrial         | [m] : $acg5p + h + nadph \rightarrow acg5sa + nadp + pi$                       |
| Arginine and Proline Metabolism   | 4.1.1.50 | R_ADMDC     | false | adenosylmethioninede-carboxylase                                            | [c] : $amet + h \rightarrow ametam + co2$                                      |
| Arginine and Proline Metabolism   | 2.6.1.11 | R_ACOTAim   | false | acteylornithinetransaminase, irreversible, mitochondrial                    | [m] : $acg5sa + glu\_l \rightarrow acorn + akg$                                |
| Urea cycle/amino group metabolism | 2.3.1.1  | R_ACGSm     | false | N-acteylglutamatesynthase, mitochondrial                                    | [m] : $accoa + glu\_l \rightarrow acglu + coa + h$                             |
| Arginine and Proline Metabolism   | 1.2.1.38 | R_ACGKm     | false | acteylglutamatekinase, mitochondrial                                        | [m] : $acglu + atp \rightarrow acg5p + adp$                                    |
| Arginine and Proline Metabolism   | 1.5.1.12 | R_4HGLSDm   | true  | L-4-hydroxyglutamatesemialdehydedehydrogenase, mitochondrial                | [m] : $4hglusa + h2o + nad \rightleftharpoons e4hglu + h + nadh$               |
| Asparagine metabolism             | 6.1.1.22 | R_ASNTRSm   | false | asparaginyl-tRNA synthetase, mitochondrial                                  | [m] : $asn\_l + atp + trnaasn \rightarrow amp + asntrna + ppi$                 |
| Asparagine metabolism             | 6.1.1.22 | R_ASNTRS    | false | Asparaginyl-tRNA synthetase                                                 | [c] : $asn\_l + atp + trnaasn \rightarrow amp + asntrna + ppi$                 |
| Asparagine metabolism             | 3.5.1.1  | R_ASNN      | false | L-asparaginase                                                              | [c] : $asn\_l + h2o \rightarrow asp\_l + nh4$                                  |
| Asparagine metabolism             | 3.5.1.1  | R_ASNNe     | false | L-asparaginase, extra-cellular                                              | [e] : $asn\_l + h2o \rightarrow asp\_l + nh4$                                  |
| Citric Acid Cycle                 | 6.2.1.4  | R_SUCOAS1m  | true  | Succinate-CoAligase (GDP-forming)                                           | [m] : $coa + gtp + succ \rightleftharpoons gdp + pi + succoa$                  |
| Citric Acid Cycle                 | 1.3.5.1  | R_SUCD2_u6m | true  | succinatedehydrogenase (ubiquinone-6), mitochondrial                        | [m] : $q6 + succ \rightleftharpoons fum + q6h2$                                |
| Citric Acid Cycle                 | 1.1.1.42 | R_ICDHyp    | false | Isocitratatedehydrogenase (NADP+)                                           | [x] : $icit + nadp \rightarrow akg + co2 + nadph$                              |
| Citric Acid Cycle                 | 1.1.1.42 | R_ICDHym    | false | Isocitratatedehydrogenase (NADP+)                                           | [m] : $icit + nadp \rightarrow akg + co2 + nadph$                              |
| Citric Acid Cycle                 | 1.1.1.42 | R_ICDHhy    | false | isocitratatedehydrogenase (NADP)                                            | [c] : $icit + nadp \rightarrow akg + co2 + nadph$                              |
| Citric Acid Cycle                 | 1.1.1.41 | R_ICDHxm    | false | Isocitratatedehydrogenase (NAD+)                                            | [m] : $icit + nad \rightarrow akg + co2 + nadh$                                |
| Citric Acid Cycle                 | 4.1.3.7  | R_CSp       | false | citratesynthase                                                             | [x] : $accoa + h2o + oaa \rightarrow cit + coa + h$                            |
| Citric Acid Cycle                 | 4.1.3.7  | R_CSm       | false | citratesynthase                                                             | [m] : $accoa + h2o + oaa \rightarrow cit + coa + h$                            |
| Citric Acid Cycle                 | 1.2.4.2  | R_AKGDbm    | false | oxoglutaratedehydrogenase (dihydrolipoamideS-succinyltransferase)           | [m] : $coa + sdhlam \rightarrow dhlam + succoa$                                |
| Citric Acid Cycle                 | 1.2.4.2  | R_AKGDam    | true  | oxoglutaratedehydrogenase (lipoamide)                                       | [m] : $akg + h + lpam \rightleftharpoons co2 + sdhlam$                         |
| Citric Acid Cycle                 | 4.2.1.3  | R_ACONT     | true  | aconitase                                                                   | [c] : $cit \rightleftharpoons icit$                                            |
| Citric Acid Cycle                 | 4.2.1.3  | R_ACONTm    | true  | Aconitatehydratase                                                          | [m] : $cit \rightleftharpoons icit$                                            |

|                                 |           |            |       |                                                        |                                                    |
|---------------------------------|-----------|------------|-------|--------------------------------------------------------|----------------------------------------------------|
| Cysteine Metabolism             | 2.3.1.30  | R_SERATi   | false | serineO-acetyltransferase, irreversible                | [c] : accoa + ser_l → acser + coa                  |
| Nucleotides                     | 2.7.1.25  | R_SADT     | false | sulfateadenylyltransferase                             | [c] : atp + h + so4 → aps + ppi                    |
| Cysteine Metabolism             | 6.1.1.16  | R_CYSTRS   | false | CysteinyI-tRNA synthetase                              | [c] : atp + cys_l + trnacys → amp + cystrna + ppi  |
| Cysteine Metabolism             | 2.5.1.47  | R_CYSS     | false | cysteinesynthase                                       | [c] : acser + h2s → ac + cys_l + h                 |
| Nucleotides                     | 3.1.3.7   | R_BPNT     | false | _3', _5'-bisphosphate-nucleotidase                     | [c] : h2o + pap → amp + pi                         |
| Nucleotides                     | 2.7.1.25  | R_ADSK     | false | adenylyl-sulfatekinase                                 | [c] : aps + atp → adp + h + paps                   |
| Fatty Acid Biosynthesis         | 2.7.7.1   | R_NMNAT    | false | nicotinamide--nucleotideadenylyltransferase            | [c] : atp + h + nmn → nad + ppi                    |
| Fatty Acid Biosynthesis         | 3.6.1.22  | R_NADDPp   | false | NADdiphosphatase, peroxisomal                          | [x] : h2o + nad → amp + h + nmn                    |
| Fatty Acid Biosynthesis         | 2.3.1.16  | R_KATp     | false | _3-ketoacyl-CoA thiolase, peroxisomal                  | [x] : 3oacoa + coa → accoa + acoa                  |
| Fatty Acid Biosynthesis         | 1.1.1.35  | R_HACDp    | true  | _3-hydroxyacyl-CoA dehydrogenase                       | [x] : 3hacoa + nad <=> 3oacoa + h + nadh           |
| Folate Metabolism               | 6.3.2.17  | R_THFGLUS  | true  | Tetrahydrofolate:L-glutamategamma-ligase (ADP-forming) | [c] : atp + glu_l + thf <=> adp + h + pi + thfglu  |
| Folate Metabolism               | 1.2.4.1   | R_THFATm   | false | tetrahydrofolateamino-methyltransferase, mitochondrial | [m] : h2o + methf → 5fthf + h                      |
| Tetrahydrobiopterin             | 5.4.16    | R_GTPCI    | false | GTPcyclo-hydrolaseI                                    | [c] : gtp + h2o → ahdt + for + h                   |
| Folate Metabolism               | 2.1.2.9   | R_FMETTRSm | false | Methionyl-tRNA formyltransferase, mitochondrial        | [m] : 10fthf + mettrna → fmettrna + h + thf        |
| Folate Metabolism               | 3.6.3.16  | R_DNMPPA   | false | Dihydroneopterinmonophosphatedephosphorylase           | [c] : dhpmp + h2o → dhnp + pi                      |
| Folate Metabolism               | 4.1.3.-   | R_ADCS     | false | _4-amino-4-deoxychorismatesynthase                     | [c] : chor + gln_l → 4adcho + glu_l                |
| Fructose and Mannose Metabolism | 5.4.2.2   | R_PMANM    | true  | phosphomannomutase                                     | [c] : man1p <=> man6p                              |
| Fructose and Mannose Metabolism | 2.7.1.105 | R_PFK26    | false | _6-phosphofructo-2-kinase                              | [c] : atp + f6p → adp + f26bp + h                  |
| Fructose and Mannose Metabolism | 5.3.1.8   | R_MAN6PI   | true  | mannose-6-phosphate-isomerase                          | [c] : man6p <=> f6p                                |
| Fructose and Mannose Metabolism | 2.7.7.13  | R_MAN1PT   | false | mannose-1-phosphate-guanlyltransferase                 | [c] : gtp + h + man1p → gdpmann + ppi              |
| Fructose and Mannose Metabolism | 2.7.1.105 | R_FBP26    | false | Fructose-2, _6-bisphosphate2-phosphatase               | [c] : f26bp + h2o → f6p + pi                       |
| Galactose metabolism            | 2.7.7.12  | R_UGLT     | true  | UDPglucose--hexose-1-phosphateuridylyltransferase      | [c] : gal1p + udpg <=> g1p + udpgal                |
| Galactose metabolism            | 5.1.3.2   | R_UDPG4E   | true  | UDPglucose4-epimerase                                  | [c] : udpg <=> udpgal                              |
| Starch and Sucrose Metabolism   | 3.2.1.20  | R_MALT     | false | alpha-glucosidase                                      | [c] : h2o + malt → 2.0 glc_d                       |
| Galactose metabolism            | 2.7.7.9   | R_GALU     | true  | UTP-glucose-1--phosphateuridylyltransferase            | [c] : g1p + h + utp <=> ppi + udpg                 |
| Galactose metabolism            | 2.7.7.10  | R_GALT     | true  | galactose-1-phosphate-uridylyltransferase              | [c] : gal1p + h + utp <=> ppi + udpgal             |
| Galactose metabolism            | 2.7.1.6   | R_GALK     | false | galactokinase                                          | [c] : atp + gal → adp + gal1p + h                  |
| Galactose metabolism            | 3.2.1.20  | R_DGGH     | false | alpha-D-glucosideglucohydrase                          | [c] : 6dg + h2o → gal + glc_d                      |
| Glutamate metabolism            | 2.7.7.23  | R_UDPACGLP | true  | UDP-N-acetylglucosaminidiphosphorylase                 | [c] : acgam1p + h + utp <=> ppi + udpacgal         |
| Glutamate metabolism            | 1.2.1.16  | R_SSALy    | false | succinate-semialdehydedehydrogenase (NADP)             | [c] : h2o + nadp + succsal → h + nadph + succ      |
| Glutamate metabolism            | 1.5.1.12  | R_PYR5CDm  | false | D1-pyrroline-5-carboxylatedehydrogenase, mitochondrial | [m] : glu5sa + h2o + nadp → glu_l + h + nadph      |
| Glutamate metabolism            | 1.4.1.13  | R_GLUSx    | false | glutamatesynthase (NADH2)                              | [c] : akg + gln_l + h + nadh → glu_l + nad         |
| Glutamate metabolism            | 1.4.1.4   | R_GLUDy    | true  | glutamatedehydrogenase (NADP)                          | [c] : glu_l + h2o + nadp <=> akg + h + nadph + nh4 |
| Glutamate metabolism            | 4.1.1.15  | R_GLUDC    | false | GlutamateDe-carboxylase                                | [c] : glu_l + h → 4abut + co2                      |

|                                           |          |            |       |                                                                    |                                                   |
|-------------------------------------------|----------|------------|-------|--------------------------------------------------------------------|---------------------------------------------------|
| Glutamate metabolism                      | 1.4.1.2  | R_GLUDxi   | false | glutamatede-hydrogenase (NAD)                                      | [c] : glu_l + h2o + nad → akgl + h + nadh + nh4   |
| Glutamate metabolism                      | 2.3.1.7  | R_CSNAIirp | false | carnitineO-acetyltransferase, reversedirection, peroxisomal        | [x] : accoa + crn → acrn + coa                    |
| Glutamate metabolism                      | 2.4.1.16 | R_CHTNS    | false | chitinsynthase                                                     | [c] : udpacgal → chitin + h + udp                 |
| Glutamate metabolism                      | 2.6.1.19 | R_ABTA     | false | _4-aminobutytratransaminase                                        | [c] : 4abut + akgl → glu_l + sucsal               |
| Glutamine Metabolism                      | 6.1.1.17 | R_GLUTRSm  | false | glutamyl-tRNA synthetase, mitochondrial                            | [m] : atp + glu_l + trnaglu → amp + glutrna + ppi |
| Glutamine Metabolism                      | 6.1.1.17 | R_GLUTRS   | false | Glutamyl-tRNA synthetase                                           | [c] : atp + glu_l + trnaglu → amp + glutrna + ppi |
| Glutamine Metabolism                      | 3.5.1.2  | R_GLUN     | false | glutaminase                                                        | [c] : gln_l + h2o → glu_l + nh4                   |
| Glutamine Metabolism                      | 6.1.1.18 | R_GLNTRS   | false | Glutamyl-tRNA synthetase                                           | [c] : atp + gln_l + trnagln → amp + glntrna + ppi |
| Glutamate metabolism                      | 6.3.1.2  | R_GLNS     | false | glutaminesynthetase                                                | [c] : atp + glu_l + nh4 → adp + gln_l + h + pi    |
| Aminosugar Metabolism                     | 2.6.1.16 | R_GF6PTA   | false | glutamine-fructose-6--phosphatetransaminase                        | [c] : f6p + gln_l → gam6p + glu_l                 |
| Glutamine Metabolism                      | 4.1.3.27 | R_ANS      | false | anthranilatesynthase                                               | [c] : chor + gln_l → anth + glu_l + h + pyr       |
| Glycine and Serine Metabolism             | 6.1.1.11 | R_SERTRS   | false | Seryl-tRNA synthetase                                              | [c] : atp + ser_l + trnaser → amp + ppi + sertrna |
| Glycine and Serine Metabolism             | 4.2.1.13 | R_SERD_L   | false | L-serinedeaminase                                                  | [c] : ser_l → nh4 + pyr                           |
| Glycine, Serine, and Threonine Metabolism | 3.1.3.3  | R_PSP_L    | false | phosphoserinephosphatase (L-serine)                                | [c] : h2o + pser_l → pi + ser_l                   |
| Glycine, Serine, and Threonine Metabolism | 2.6.1.52 | R_PSERT    | false | phosphoserinetransaminase                                          | [c] : 3php + glu_l → akgl + pser_l                |
| Glycine, Serine, and Threonine Metabolism | 1.1.1.95 | R_PGCD     | false | phosphoglyceratedehydrogenase                                      | [c] : 3pg + nad → 3php + h + nadh                 |
| Glycine and Serine Metabolism             | 2.7.1.39 | R_HSK      | false | homoserinekinase                                                   | [c] : atp + hom_l → adp + h + phom                |
| Glycine and Serine Metabolism             | 1.1.1.3  | R_HSDxi    | false | homoserinedehydrogenase (NADH), irreversible                       | [c] : aspsa + h + nadh → hom_l + nad              |
| Glycine and Serine Metabolism             | 1.1.1.3  | R_HSDyi    | false | homoserinedehydrogenase (NADP), irreversible                       | [c] : aspsa + h + nadph → hom_l + nadp            |
| Glycine and Serine Metabolism             | 6.1.1.14 | R_GLYTRS   | false | Glycyl-tRNA synthetase                                             | [c] : atp + gly + trnagly → amp + glytrna + ppi   |
| Glycine and Serine Metabolism             | 1.4.4.2  | R_GLYCLm   | false | glycinecleavagesystem, mitochondrial                               | [m] : gly + nad + thf → co2 + mlthf + nadh + nh4  |
| Glycine, Serine, and Threonine Metabolism | 2.1.2.1  | R_GHMT2rm  | true  | glycinehydroxymethyltransferase, reversible, mitochondrial         | [m] : ser_l + thf <=> gly + h2o + mlthf           |
| Glycine, Serine, and Threonine Metabolism | 2.1.2.1  | R_GHMT2r   | true  | glycinehydroxymethyltransferase, reversible                        | [c] : ser_l + thf <=> gly + h2o + mlthf           |
| Glycine, Serine, and Threonine Metabolism | 1.4.4.2  | R_GCCcm    | true  | glycine-cleavagecomplex (lipoylprotein), mitochondrial             | [m] : dhlpro + nad <=> h + lpro + nadh            |
| Glycine, Serine, and Threonine Metabolism | 1.4.4.2  | R_GCCbim   | false | glycine-cleavagecomplex (lipoylprotein)irreversible, mitochondrial | [m] : alpro + thf → dhlpro + mlthf + nh4          |
| Glycine, Serine, and Threonine Metabolism | 1.4.4.2  | R_GCCam    | true  | glycine-cleavagecomplex (lipoylprotein), mitochondrial             | [m] : gly + h + lpro <=> alpro + co2              |
| Glycine, Serine, and Threonine Metabolism | 1.4.4.2  | R_GCC2cm   | true  | glycine-cleavagecomplex (lipoamide), mitochondrial                 | [m] : dhlam + nad <=> h + lpam + nadh             |
| Glycine, Serine, and Threonine Metabolism | 1.4.4.2  | R_GCC2bim  | false | glycine-cleavagesystem (lipoamide)irreversible, mitochondrial      | [m] : alpam + thf → dhlam + mlthf + nh4           |
| Glycine, Serine, and Threonine Metabolism | 1.4.4.2  | R_GCC2am   | true  | glycine-cleavagecomplex (lipoamide), mitochondrial                 | [m] : gly + h + lpam <=> alpam + co2              |
| Methionine Metabolism                     | 4.2.1.22 | R_CYSTS    | false | cystathioninebeta-synthase                                         | [c] : hcys_l + ser_l → cyst_l + h2o               |

|                                 |           |            |       |                                                                                                                    |                                                             |
|---------------------------------|-----------|------------|-------|--------------------------------------------------------------------------------------------------------------------|-------------------------------------------------------------|
| Glycine and Serine Metabolism   | 2.6.1.-   | R_AGT      | true  | alanine-glyoxylatetransaminase                                                                                     | [c] : ala.l + glx <=> gly + pyr                             |
| Glycolysis/Gluconeogenesis      | 5.3.1.1   | R_TPI      | true  | triose-phosphate-isomerase                                                                                         | [c] : dhap <=> g3p                                          |
| Glycolysis/Gluconeogenesis      | 2.7.1.40  | R_PYK      | false | pyruvatekinase                                                                                                     | [c] : adp + h + pep → atp + pyr                             |
| Glycolysis/Gluconeogenesis      | 5.4.2.1   | R_PGM      | true  | phospho-glyceratemutase                                                                                            | [c] : 2pg <=> 3pg                                           |
| Glycolysis/Gluconeogenesis      | 2.7.2.3   | R_PGK      | true  | phosphoglyceratekinase                                                                                             | [c] : 3pg + atp <=> 13dpg + adp                             |
| Glycolysis/Gluconeogenesis      | 5.3.1.9   | R_PGI      | true  | glucose-6-phosphate-isomerase                                                                                      | [c] : g6p <=> f6p                                           |
| Glycolysis/Gluconeogenesis      | 1.2.4.1   | R_PDHm     | false | pyruvatedehydrogenase                                                                                              | [m] : coa + nad + pyr → accoa + co2 + nadh                  |
| Glycolysis/Gluconeogenesis      | 1.2.4.2   | R_PDHcm    | false | pyruvatedehydrogenase (dihydrolipoamidedehydrogenase)                                                              | [m] : dhlam + nad → h + lpam + nadh                         |
| Fructose and Mannose Metabolism | 2.7.1.1   | R_HEX7     | false | hexokinase (D-fructose:ATP)                                                                                        | [c] : atp + fru → adp + f6p + h                             |
| Fructose and Mannose Metabolism | 2.7.1.1   | R_HEX4     | false | hexokinase (D-mannose:ATP)                                                                                         | [c] : atp + man → adp + h + man6p                           |
| Glycolysis/Gluconeogenesis      | 2.7.1.1   | R_HEX1     | false | hexokinase (D-glucose:ATP)                                                                                         | [c] : atp + glc.d → adp + g6p + h                           |
| Glycolysis/Gluconeogenesis      | 2.7.1.2   | R_GLUK     | false | Glucokinase                                                                                                        | [c] : atp + glc.d → adp + g6p.b + h                         |
| Glycolysis/Gluconeogenesis      | 1.2.1.12  | R_GAPD     | true  | glyceraldehyde-3-phosphatedehydrogenase                                                                            | [c] : g3p + nad + pi <=> 13dpg + h + nadh                   |
| Glycolysis/Gluconeogenesis      | 5.3.1.9   | R_G6PI2    | true  | Glucose-6-phosphate-isomerase                                                                                      | [c] : g6p.b <=> f6p.b                                       |
| Glycolysis/Gluconeogenesis      | 5.3.1.9   | R_G6PI     | true  | Glucose-6-phosphate-isomerase                                                                                      | [c] : g6p <=> g6p.b                                         |
| Glycolysis/Gluconeogenesis      | 4.1.2.13  | R_FBA3     | true  | Sedoheptulose1,7-bisphosphateD-glyceraldehyde-3--phosphate-lyase                                                   | [c] : s17bp <=> dhap + e4p                                  |
| Fructose and Mannose Metabolism | 4.1.2.13  | R_FBA2     | true  | D-Fructose1-phosphateD-glyceraldehyde-3--phosphate-lyase                                                           | [c] : flp <=> dhap + glyald                                 |
| Glycolysis/Gluconeogenesis      | 4.1.2.13  | R_FBA      | true  | fructose-bisphosphate-aldolase                                                                                     | [c] : fdp <=> dhap + g3p                                    |
| Glycolysis/Gluconeogenesis      | 4.2.1.11  | R_ENO      | true  | enolase                                                                                                            | [c] : 2pg <=> h2o + pep                                     |
| Glycoprotein Metabolism         | 2.4.1.131 | R_G12MT2g  | false | Glycolipid1, 2-alpha-D-mannosyltransferase, Golgiapparatus                                                         | [g] : gdpmann + m3macchitppdol → gdp + h + m4macchitppdol   |
| Glycoprotein Metabolism         | 2.4.1.131 | R_G12MT1g  | false | Glycolipid1, 2-alpha-D-mannosyltransferase, Golgiapparatus                                                         | [g] : gdpmann + m2macchitppdol → gdp + h + m3macchitppdol   |
| Glycoprotein Metabolism         | 2.4.1.109 | R_DOLPMMer | false | Dolichyl-phosphate-mannose-proteinmannosyltransferase, endoplasmicreticular                                        | [r] : dolmanp → dolp + h + mannan                           |
| Histidine Metabolism            | 3.5.3.19  | R_UGLYChr  | true  | Ureidoglycolate-hydrolyase                                                                                         | [c] : 2.0 h + h2o + urdglyc <=> 1.0 co2 + 1.0 glx + 2.0 nh4 |
| Pentose Phosphate Pathway       | 2.4.2.17  | R_PRPPS    | true  | phosphoribosylpyrophosphatesynthetase                                                                              | [c] : atp + r5p <=> amp + h + prpp                          |
| Histidine Metabolism            | 5.3.1.16  | R_PRMICi   | false | _1- (5-phosphoribosyl)-5-[ (5-phosphoribosylamino)methylideneamino]imidazole-4-carboxamideisomerase (irreversible) | [c] : prfp → prlp                                           |
| Histidine Metabolism            | 3.5.4.19  | R_PRATPP   | false | phosphoribosyl-ATPpyrophosphatase                                                                                  | [c] : h2o + prbatp → h + ppi + prbamp                       |
| Histidine Metabolism            | 3.5.4.19  | R_PRAMPC   | false | phosphoribosyl-AMPcyclo-hydrolyase                                                                                 | [c] : h2o + prbamp → prfp                                   |
| Histidine Metabolism            | 4.2.1.19  | R_IGPDH    | false | imidazoleglycerol--phosphatedehydratase                                                                            | [c] : eig3p → h2o + imacp                                   |
| Histidine Metabolism            | 2.4.2.-   | R_IG3PS    | false | Imidazole-glycerol-3--phosphatesynthase                                                                            | [c] : gln.l + prlp → aicar + eig3p + glu.l + h              |
| Histidine Metabolism            | 2.6.1.9   | R_HSTPT    | false | histidinol-phosphate-transaminase                                                                                  | [c] : glu.l + imacp → akp + hisp                            |
| Histidine Metabolism            | 6.1.1.21  | R_HISTRs   | false | Histidyl-tRNA synthetase                                                                                           | [c] : atp + his.l + trnahis → amp + histrna + ppi           |
| Histidine Metabolism            | 6.1.1.21  | R_HISTRsm  | false | histidyl-tRNA synthetase, mitochondrial                                                                            | [m] : atp + his.l + trnahis → amp + histrna + ppi           |
| Histidine Metabolism            | 3.1.3.15  | R_HISTP    | false | histidinol-phosphatase                                                                                             | [c] : h2o + hisp → histd + pi                               |
| Histidine Metabolism            | 1.1.1.23  | R_HISTD    | false | histidinoldehydrogenase                                                                                            | [c] : h2o + histd + 2.0 nad → 3.0 h + 1.0 his.l + 2.0 nadh  |
| Histidine Metabolism            | 2.4.2.17  | R_ATPPRT   | false | ATPphosphoribosyltransferase                                                                                       | [c] : atp + prpp → ppi + prbatp                             |

|                            |           |            |       |                                                                     |                                                   |
|----------------------------|-----------|------------|-------|---------------------------------------------------------------------|---------------------------------------------------|
| Histidine Metabolism       | 2.1.1.-   | R_ARMT     | false | hnRNHParginineN-methyltransferase                                   | [c] : amet + his_l → npmehis + ahcys + h          |
| Histidine Metabolism       | 3.5.2.5   | R_ALLTNr   | true  | allantoinase, reversible-reaction                                   | [c] : alltn + h2o <=> alltt + h                   |
| Histidine Metabolism       | 3.5.3.4   | R_ALLTAHr  | true  | Allantoateamidohydrolase, reversible                                | [c] : alltt + h2o <=> urdglyc + urea              |
| Fatty Acid Metabolism      | 1.2.1.2   | R_FDHD     | false | formatedehydrogenase                                                | [c] : for + nad → co2 + nadh                      |
| Methionine Metabolism      | 4.2.99.9  | R_SHSL4r   | true  | O-succinylhomoserinylase (elimination), reversible                  | [c] : h2o + suchms <=> 2obut + h + nh4 + succ     |
| Methionine Metabolism      | 2.5.1.48  | R_SHSL1    | false | O-succinylhomoserinylase (L-cysteine)                               | [c] : cys_l + suchms → cyst_l + h + succ          |
| Methionine Metabolism      | 2.1.1.14  | R_MHPGLUT  | false | 5-methyl-tetrahydropteroylglutamate-homocysteineS-methyltransferase | [c] : hcys_l + mhpglu → hpglu + met_l             |
| Methionine Metabolism      | 6.1.1.10  | R_METTRSm  | false | methionyl-tRNA synthetase, mitochondrial                            | [m] : atp + met_l + trnamet → amp + mettrna + ppi |
| Methionine Metabolism      | 6.1.1.10  | R_METTRS   | false | Methionyl-tRNA synthetase                                           | [c] : atp + met_l + trnamet → amp + mettrna + ppi |
| Methionine Metabolism      | 2.1.1.13  | R_METS     | false | methioninesynthase                                                  | [c] : 5mthf + hcys_l → h + met_l + thf            |
| Methionine Metabolism      | 4.2.99.9  | R_METB1    | false | metb1                                                               | [c] : achms + cys_l → ac + cyst_l + h             |
| Methionine Metabolism      | 2.5.1.6   | R_METAT    | false | methionineadenosyltransferase                                       | [c] : atp + h2o + met_l → amet + pi + ppi         |
| Methionine Metabolism      | 2.3.1.31  | R_HSERTA   | true  | homoserineO-trans-acetylase                                         | [c] : accoa + hom_l <=> achms + coa               |
| Methionine Metabolism      | 2.1.1.98  | R_DIPS     | false | diphthinesynthase                                                   | [c] : amet + caphis → ahcys + cmaphis + h         |
| Methionine Metabolism      | 4.4.1.8   | R_CYSTLp   | false | cystathioneb-lyase, peroxisomal                                     | [x] : cyst_l + h2o → hcys_l + nh4 + pyr           |
| Methionine Metabolism      | 4.4.1.8   | R_CYSTL    | false | cystathioneb-lyase                                                  | [c] : cyst_l + h2o → hcys_l + nh4 + pyr           |
| Cysteine Metabolism        | 4.4.1.1   | R_CYSTGL   | false | cystathioneg-lyase                                                  | [c] : cyst_l + h2o → 2obut + cys_l + nh4          |
| Methionine Metabolism      | 4.2.99.10 | R_AHSERL2  | false | O-acetylhomoserine (thiol)-lyase                                    | [c] : achms + h2s → ac + h + hcys_l               |
| Methionine Metabolism      | 4.2.99.10 | R_AHSERL   | false | O-acetylhomoserine (thiol)-lyase                                    | [c] : achms + ch4s → ac + h + met_l               |
| Methionine Metabolism      | 3.3.1.1   | R_AHCi     | false | adenosylhomocysteinase                                              | [c] : ahcys + h2o → adn + hcys_l                  |
| NAD Metabolism             | 2.7.7.18  | R_NNATm    | false | nicotinate-nucleotide-adenyltransferase, mitochondrial              | [m] : atp + h + nicrnt → dnad + ppi               |
| NAD Metabolism             | 2.7.7.18  | R_NNAT     | false | nicotinate-nucleotide-adenyltransferase                             | [c] : atp + h + nicrnt → dnad + ppi               |
| NAD Biosynthesis           | 3.5.1.19  | R_NNAMrm   | true  | nicotinamidase, reversible, mitochondrial                           | [m] : h2o + ncam <=> nac + nh4                    |
| NAD Biosynthesis           | 3.5.1.19  | R_NNAMr    | true  | nicotinamidase, reversible                                          | [c] : h2o + ncam <=> nac + nh4                    |
| NAD Metabolism             | 2.7.7.1   | R_NMNATm   | false | nicotinamide--nucleotideadenyltransferase, mitochondrial            | [m] : atp + h + nmnu → nad + ppi                  |
| NAD Biosynthesis           | 6.3.1.5   | R_NADS1    | false | NADsynthase (nh3)                                                   | [c] : atp + dnad + nh4 → amp + h + nad + ppi      |
| NAD Biosynthesis           | 6.3.1.5   | R_NADS1m   | false | NADsynthase (nh3), mitochondrial                                    | [m] : atp + dnad + nh4 → amp + h + nad + ppi      |
| NAD Biosynthesis           | 2.7.1.23  | R_NADKm    | false | NADkinase, mitochondrial                                            | [m] : atp + nad → adp + h + nadp                  |
| NAD Metabolism             | 2.7.1.23  | R_NADK     | false | NADkinase                                                           | [c] : atp + nad → adp + h + nadp                  |
| Nitrogen Metabolism        | 6.3.4.6   | R_UREASE   | true  | ureacarbonylase                                                     | [c] : atp + hco3 + urea <=> adp + allphn + h + pi |
| Nitrogen Metabolism        | 3.5.5.1   | R_NTRLASE  | false | nitrilase                                                           | [c] : 2.0 h2o + ind3acn1 → ind3ac + nh4           |
| Nitrogen Metabolism        | 3.5.1.54  | R_ALPHNH   | false | allophanate-hydrolase                                               | [c] : allphn + 3.0 h + h2o → 2.0 co2 + 2.0 nh4    |
| Nucleotide Salvage Pathway | 2.4.2.22  | R_XPPT     | false | xanthinephosphoribosyltransferase                                   | [c] : prpp + xan → ppi + xmp                      |
| Nucleotide Salvage Pathway | 2.7.4.-   | R_URIDK2rn | true  | uridylatekinase (dUMP), nuclear                                     | [n] : atp + dump <=> adp + dudp                   |
| Nucleotide Salvage Pathway | 2.7.4.-   | R_URIDK2r  | true  | uridylatekinase (dUMP)                                              | [c] : atp + dump <=> adp + dudp                   |
| Nucleotides                | 2.7.4.14  | R_UMPK     | true  | UMPkinase                                                           | [c] : atp + ump <=> adp + udp                     |
| Nucleotides                | 2.7.4.14  | R_UMPKn    | true  | UMPkinase, nuclear                                                  | [n] : atp + ump <=> adp + udp                     |
| Nucleotides                | 2.7.4.6   | R_NDPK9    | true  | nucleoside-diphosphate-kinase (ATP:IDP)                             | [c] : atp + idp <=> adp + itp                     |



|                                 |          |                  |       |                                                      |                                                   |
|---------------------------------|----------|------------------|-------|------------------------------------------------------|---------------------------------------------------|
| Nucleotides                     | 2.7.4.6  | R_NDPK8          | true  | nucleoside-diphosphate-kinase (ATP:dADP)             | [c] : atp + dadp <=> adp + datp                   |
| Nucleotides                     | 2.7.4.6  | R_NDPK7          | true  | nucleoside-diphosphate-kinase (ATP:dCDP)             | [c] : atp + dcdp <=> adp + dctp                   |
| Nucleotides                     | 2.7.4.6  | R_NDPK6          | true  | nucleoside-diphosphate-kinase (ATP:dUDP)             | [c] : atp + dudp <=> adp + dutp                   |
| Nucleotides                     | 2.7.4.6  | R_NDPK5          | true  | nucleoside-diphosphate-kinase (ATP:dGDP)             | [c] : atp + dgdp <=> adp + dgtp                   |
| Nucleotides                     | 2.7.4.6  | R_NDPK4          | true  | nucleoside-diphosphate-kinase (ATP:dTDP)             | [c] : atp + dtdp <=> adp + dttp                   |
| Nucleotides                     | 2.7.4.6  | R_NDPK3          | true  | nucleoside-diphosphate-kinase (ATP:CDP)              | [c] : atp + cdp <=> adp + ctp                     |
| Nucleotides                     | 2.7.4.6  | R_NDPK2          | true  | nucleoside-diphosphate-kinase (ATP:UDP)              | [c] : atp + udp <=> adp + utp                     |
| Nucleotides                     | 2.7.4.6  | R_NDPK1          | true  | nucleoside-diphosphate-kinase (ATP:GDP)              | [c] : atp + gdp <=> adp + gtp                     |
| Salvage Pathway                 | 2.4.2.8  | R_HXPRT          | false | hypoxanthinephosphoribosyltransferase (Hypoxanthine) | [c] : hxan + prpp → imp + ppi                     |
| Nucleotide Salvage Pathway      | .        | R_GNNUC          | false | gnnuc                                                | [c] : gsn + h2o → gua + rib_d                     |
| Pyrimidine Catabolism           | 3.5.4.14 | R_DCYTD          | false | deoxycytidinedeaminase                               | [c] : dcyt + h + h2o → duri + nh4                 |
| Nucleotide Salvage Pathway      | 3.5.4.12 | R_DCTPD          | false | dCTPdeaminase                                        | [c] : dctp + h + h2o → dutp + nh4                 |
| Nucleotides                     | 2.7.4.14 | R_CYTK2          | true  | cytidylatekinase (dCMP)                              | [c] : atp + demp <=> adp + dcdp                   |
| Nucleotides                     | 2.7.4.14 | R_CYTK1          | true  | cytidylatekinase (CMP)                               | [c] : atp + cmp <=> adp + cdp                     |
| Nucleotide Salvage Pathway      | 2.7.1.48 | R_CYTDK2         | false | cytidinekinase (GTP)                                 | [c] : cytd + gtp → cmp + gdp + h                  |
| Nucleotide Salvage Pathway      | 3.2.2.4  | R_AMPN           | false | AMPnucleosidase                                      | [c] : amp + h2o → ade + r5p                       |
| Nucleotide Salvage Pathway      | 3.2.2.8  | R_ADNUC          | false | adenosine-hydrolase                                  | [c] : adn + h2o → ade + rib_d                     |
| Nucleotide Salvage Pathway      | 2.7.4.3  | R_ADK4           | true  | adentylatekinase (ITP)                               | [c] : amp + itp <=> adp + idp                     |
| Nucleotide Salvage Pathway      | 2.7.4.3  | R_ADK4m          | true  | adentylatekinase (ITP), mitochondrial                | [m] : amp + itp <=> adp + idp                     |
| Nucleotides                     | .        | R_ADK3           | true  | adentylatekinase (GTP)                               | [c] : amp + gtp <=> adp + gdp                     |
| Nucleotides                     | .        | R_ADK3m          | true  | adentylatekinase (GTP)                               | [m] : amp + gtp <=> adp + gdp                     |
| Nucleotides                     | 2.7.4.10 | R_ADK1m          | true  | adenylatekinase, mitochondrial                       | [m] : amp + atp <=> 2.0 adp                       |
| Nucleotides                     | 2.7.4.3  | R_ADK1           | true  | adenylatekinase                                      | [c] : amp + atp <=> 2.0 adp                       |
| Salvage Pathway                 | 2.4.2.7  | R_GUAPRT         | false | guaninephosphoribosyltransferase                     | [c] : gua + prpp → gmp + ppi                      |
| Other Amino Acid Metabolism     | 2.3.1.88 | R_PEPAT          | false | Peptidealpha-N-acetyltransferase                     | [c] : accoa + pepd → apeg + coa + h               |
| Other Amino Acid Metabolism     | 3.5.5.1  | R_NTRLASE3       | false | nitrilase                                            | [c] : acybut + 2.0 h2o → glu_l + nh4              |
| Other Amino Acid Metabolism     | 3.5.5.1  | R_NTRLASE2       | false | nitrilase                                            | [c] : apro + 2.0 h2o → ala_l + nh4                |
| Arginine and Proline Metabolism | 1.2.1.3  | R_NABTNO         | false | N4-Acetylamino butanal:NAD+oxidoreductase            | [c] : h2o + n4abutn + nad → 4aabutn + h + nadh    |
| Other Amino Acid Metabolism     | 1.2.1.21 | R_LCADm          | true  | lactaldehydedehydrogenase, mitochondrial             | [m] : h2o + lald_l + nad <=> h + lac_l + nadh     |
| Other Amino Acid Metabolism     | 2.3.2.2  | R_GTMLT          | false | g-glutamyltransferase                                | [c] : ala_l + gthrd → cgly + gluala               |
| Glutathione Metabolism          | 6.3.2.3  | R_GTHS           | false | glutathionesynthetase                                | [c] : atp + glucys + gly → adp + gthrd + h + pi   |
| Glutathione Metabolism          | 1.11.1.9 | R_GTHP           | true  | glutathioneperioxidase                               | [c] : 2.0 gthrd + h2o2 <=> 1.0 gthox + 2.0 h2o    |
| Glutamate metabolism            | 1.6.4.2  | R_GTHO           | false | glutathioneoxidoreductase                            | [c] : gthox + h + nadph → gthrd + nadp            |
| Glutathione Metabolism          | 6.3.2.2  | R_GLUCYS         | false | gamma-glutamylcysteinesynthetase                     | [c] : atp + cys_l + glu_l → adp + glucys + h + pi |
| Other Amino Acid Metabolism     | 2.3.1.97 | R_GLPT           | false | glycylpeptideN-tetradecanoyltransferase              | [c] : glp + tdcoa → coa + tglp                    |
| Other Amino Acid Metabolism     | 1.2.1.19 | R_ABUTDm         | false | Aminobutyraldehydedehydrogenase, mitochondrial       | [m] : 4abutn + h2o + nad → 4abut + h + nadh       |
| Oxidative Phosphorylation       | 1.3.5.1  | R_SUCD3_DASH_u6m | true  | succinatedehydrogenase (ubiquinone-6), mitochondrial | [m] : fadh2 + q6 <=> fad + q6h2                   |
| Citric Acid Cycle               | 1.3.5.1  | R_SUCD1m         | true  | succinatedehydrogenase                               | [m] : fad + succ <=> fadh2 + fum                  |

|                                   |           |                   |       |                                                           |                                                                          |
|-----------------------------------|-----------|-------------------|-------|-----------------------------------------------------------|--------------------------------------------------------------------------|
| Oxidative Phosphorylation         | 3.6.1.1   | R_PPAm            | false | inorganicdiphosphatase                                    | [m] : h2o + ppi → 1.0 h + 2.0 pi                                         |
| Oxidative Phosphorylation         | 3.6.1.1   | R_PPA             | false | inorganicdiphosphatase                                    | [c] : h2o + ppi → 1.0 h + 2.0 pi                                         |
| Oxidative Phosphorylation         | 1.6.5.3   | R_NADH2_DASH_u6m  | false | NADHdehydrogenase, mitochondrial                          | [m] : h + nadh + q6 → nad + q6h2                                         |
| Oxidative Phosphorylation         | 1.6.99.3  | R_NADH2_DASH_u6cm | false | NADHdehydrogenase, cytosolic/mitochondrial                | h[c] + nadh[c] + q6[m] → nad[c] + q6h2[m]                                |
| Oxidative Phosphorylation         | 1.1.1.37  | R_MDHp            | true  | malatedehydrogenase, peroxisomal                          | [x] : mal_l + nad <=> h + nadh + oaa                                     |
| Citric Acid Cycle                 | 1.1.1.37  | R_MDHm            | true  | malatedehydrogenase, mitochondrial                        | [m] : mal_l + nad <=> h + nadh + oaa                                     |
| Citric Acid Cycle                 | 1.1.1.37  | R_MDH             | true  | malatedehydrogenase                                       | [c] : mal_l + nad <=> h + nadh + oaa                                     |
| Citric Acid Cycle                 | 4.2.1.2   | R_FUM             | true  | fumarase                                                  | [c] : fum + h2o <=> mal_l                                                |
| Citric Acid Cycle                 | 4.2.1.2   | R_FUMm            | true  | fumarase, mitochondrial                                   | [m] : fum + h2o <=> mal_l                                                |
| Oxidative Phosphorylation         | 1.10.2.2  | R_CYOR_u6m        | false | ubiquinol-6cytochromereductase                            | 2.0 ficytc[m] + 1.5 h[m] + q6h2[m] → focytc[m] + h[c] + q6[m]            |
| Oxidative Phosphorylation         | 1.9.3.1   | R_CYOOm           | false | cytochromecoxidase, mitochondrial                         | 4.0 focytc[m] + 6.0 h[m] + o2[m] → 4.0 ficytc[m] + 6.0 h[c] + 2.0 h2o[m] |
| Oxidative Phosphorylation         | 3.6.3.14  | R_ATPS3v          | false | ATPSynthase, vacuole                                      | adp[v] + 3.0 h[c] + pi[v] → atp[v] + h[v] + h2o[v]                       |
| Oxidative Phosphorylation         | 3.6.3.14  | R_ATPS3m          | false | ATPSynthase, mitochondrial                                | adp[m] + 3.0 h[c] + pi[m] → atp[m] + h[m] + h2o[m]                       |
| Pantothenate and CoA Biosynthesis | 6.3.2.1   | R_PANTS           | false | pantothenatesynthase                                      | [c] : ala_b + atp + pant_r → amp + h + pnto_r + ppi                      |
| Pantothenate and CoA Biosynthesis | 1.1.1.169 | R_DPRm            | false | _2-dehydropantoate2--reductase, mitochondrial             | [m] : 2dhp + h + nadph → nadp + pant_r                                   |
| Pantothenate and CoA Biosynthesis | 2.8.1.6   | R_BTSr            | true  | biotinsynthase                                            | [c] : dtbt + s <=> 1.0 btn + 2.0 h                                       |
| Pantothenate and CoA Biosynthesis | 2.6.1.62  | R_AMAOTr          | true  | adenosylmethionine-8-amino-7-oxononanoatetransaminase     | [c] : 8aonn + amet <=> amob + dann                                       |
| Pentose Phosphate Pathway         | 2.2.1.1   | R_TKT2            | true  | transketolase                                             | [c] : e4p + xu5p_d <=> f6p + g3p                                         |
| Pentose Phosphate Pathway         | 2.2.1.1   | R_TKT1            | true  | transketolase                                             | [c] : r5p + xu5p_d <=> g3p + s7p                                         |
| Pentose Phosphate Pathway         | 2.2.1.2   | R_TALA            | true  | transaldolase                                             | [c] : g3p + s7p <=> e4p + f6p                                            |
| Pentose Phosphate Pathway         | 5.1.3.1   | R_RPE             | true  | ribose5-phosphate3-epimerase                              | [c] : ru5p_d <=> xu5p_d                                                  |
| Pentose Phosphate Pathway         | 2.7.1.15  | R_RBK             | false | ribokinase                                                | [c] : atp + rib_d → adp + h + r5p                                        |
| Pentose Phosphate Pathway         | 5.4.2.2   | R_PPM             | true  | phosphopentomutase                                        | [c] : r1p <=> r5p                                                        |
| Glycolysis/Gluconeogenesis        | 5.4.2.2   | R_PGMT            | true  | phosphoglucomutase                                        | [c] : g1p <=> g6p                                                        |
| Pentose Phosphate Pathway         | 3.1.1.31  | R_PGL             | false | _6-phosphogluconolactonase                                | [c] : 6pgl + h2o → 6pgc + h                                              |
| Pentose Phosphate Pathway         | 1.1.1.43  | R_GND             | false | phosphogluconatedehydrogenase                             | [c] : 6pgc + nadp → co2 + nadph + ru5p_d                                 |
| Pentose Phosphate Pathway         | 1.1.1.49  | R_G6PDH2          | false | glucose6-phosphatedehydrogenase                           | [c] : g6p + nadp → 6pgl + h + nadph                                      |
| Pentose Phosphate Pathway         | 2.7.1.15  | R_DRBK            | false | Deoxyribokinase                                           | [c] : atp + drib → 2dr5p + adp + h                                       |
| Phospholipid Biosynthesis         | 2.7.8.8   | R_PSERSm_SC       | true  | phosphatidylserinesynthase, yeast-specific, mitochondrial | [m] : 0.01 cdpdag_sc + ser_l <=> 1.0 cmp + 1.0 h + 0.01 ps_sc            |
| Phospholipid Biosynthesis         | 2.7.8.8   | R_PSERS_SC        | true  | phosphatidylserinesynthase, yeast-specific                | [c] : 0.01 cdpdag_sc + ser_l <=> 1.0 cmp + 1.0 h + 0.01 ps_sc            |
| Phospholipid Biosynthesis         | 4.1.1.65  | R_PSERDv_SC       | false | phosphatidylserinedecarboxylase, yeast-specific, vacuolar | [v] : h + 0.01 ps_sc → 1.0 co2 + 0.01 pe_sc                              |

|                                           |           |              |       |                                                                                    |                                                                                                                                                               |
|-------------------------------------------|-----------|--------------|-------|------------------------------------------------------------------------------------|---------------------------------------------------------------------------------------------------------------------------------------------------------------|
| Phospholipid Biosynthesis                 | 4.1.1.65  | R_PSERDg_SC  | false | phosphatidylserinede-carboxylase, yeast-specific, Golgi                            | [g] : h + 0.01 ps_sc → 1.0 co2 + 0.01 pe_sc                                                                                                                   |
| Phospholipid Biosynthesis                 | 4.1.1.65  | R_PSERDm_SC  | false | phosphatidylserinede-carboxylase, yeast-specific, mitochondrial                    | [m] : h + 0.01 ps_sc → 1.0 co2 + 0.01 pe_sc                                                                                                                   |
| Phospholipid Biosynthesis                 | 2.1.1.16  | R_PMETM_SC   | false | Phosphatidyl-N-methylethanolamineN-methyltransferase, yeast-specific               | [c] : amet + 0.01 ptd2meeta_sc → 1.0 ahcys + 1.0 h + 0.01 pc_sc                                                                                               |
| Phospholipid Biosynthesis                 | 2.7.1.67  | R_PIN4K_SC   | false | phosphatidylinositol4-kinase, yeast-specific                                       | [c] : atp + 0.01 ptd1ino_sc → 1.0 adp + 1.0 h + 0.01 ptd4ino_sc                                                                                               |
| Phospholipid Biosynthesis                 | 2.7.1.67  | R_PIN4Kn_SC  | false | phosphatidylinositol4-kinase, nuclear, yeast-specific                              | [n] : atp + 0.01 ptd1ino_sc → 1.0 adp + 1.0 h + 0.01 ptd4ino_sc                                                                                               |
| Phospholipid Biosynthesis                 | 2.7.1.137 | R_PIN3K_SC   | false | _1-phosphatidylinositol3-kinase, yeast-specific                                    | [c] : atp + 0.01 ptd1ino_sc → 1.0 adp + 1.0 h + 0.01 ptd3ino_sc                                                                                               |
| Phospholipid Biosynthesis                 | 3.1.4.11  | R_PI45BPP_SC | false | _1-phosphatidylinositol4, 5-bisphosphate-phosphodiesterase, yeast-specific         | [c] : h2o + 0.01 ptd145bp_sc → 12dgr_sc + h + mi145p                                                                                                          |
| Phospholipid Biosynthesis                 | 2.1.1.17  | R_PETOHM_SC  | false | phosphatidylethanolamineN-methyltransferase, yeast-specific                        | [c] : amet + 0.01 pe_sc → 1.0 ahcys + 1.0 h + 0.01 ptdmeeta_sc                                                                                                |
| Inositol Phosphate Metabolism             | 5.5.1.4   | R_MIIPS      | false | myo-Inositol-1--phosphatesynthase                                                  | [c] : g6p → mi1p_d                                                                                                                                            |
| Phospholipid Biosynthesis                 | 2.1.1.16  | R_MFAPS_SC   | false | methylene-fatty-acyl--phospholipidsynthase, yeast-specific                         | [c] : amet + 0.01 ptdmeeta_sc → 1.0 ahcys + 1.0 h + 0.01 ptd2meeta_sc                                                                                         |
| Phospholipid Biosynthesis                 | .         | R_LPP_SC     | false | lipidphosphate-phosphatase, yeast-specific                                         | [c] : 0.01 dagpy_sc + h2o → h + pa_sc + pi                                                                                                                    |
| Phospholipid Biosynthesis                 | 2.7.8.1   | R_ETHAPT_SC  | true  | Ethanolaminephosphotransferase, yeast-specific                                     | [c] : 0.01 12dgr_sc + cdpea <=> 1.0 cmp + 1.0 h + 0.01 pe_sc                                                                                                  |
| Glycerophospholipid Metabolism            | 2.7.1.32  | R_ETHAK      | false | Ethanolaminekinase                                                                 | [c] : atp + etha → adp + ethamp + h                                                                                                                           |
| Phospholipid Biosynthesis                 | 3.1.3.4   | R_DAGPYP_SC  | false | diacylglycerolpyrophosphatephosphatase, yeast-specific                             | [c] : h2o + 0.01 pa_sc → 12dgr_sc + pi                                                                                                                        |
| Phospholipid Biosynthesis                 | 2.7.8.1   | R_DAGCPT_SC  | false | diacylglycerolcholinephosphotransferase, yeast-specific                            | [c] : 0.01 12dgr_sc + cdpchol → 1.0 cmp + 1.0 h + 0.01 pc_sc                                                                                                  |
| Phospholipid Biosynthesis                 | 2.7.8.5   | R_CLPNsm_SC  | false | cardiolipinsynthase, yeast-specific, mitochondrial                                 | [m] : 0.01 cdpdag_sc + 0.01 pg_sc → clpn_sc + cmp + h                                                                                                         |
| Glycerophospholipid Metabolism            | 2.7.1.32  | R_CHOLK      | false | Cholinekinase                                                                      | [c] : atp + chol → adp + cholp + h                                                                                                                            |
| Phospholipid Biosynthesis                 | 2.7.8.8   | R_CDPDGPm_SC | true  | CDP-diacylglycerol--serineO-phosphatidyltransferase, yeast-specific, mitochondrial | [m] : 0.01 cdpdag_sc + glyc3p <=> 1.0 cmp + 1.0 h + 0.01 pgp_sc                                                                                               |
| Phospholipid Biosynthesis                 | 2.3.1.51  | R_AGAT_SC    | false | _1-Acyl-glycerol-3-phosphateacyltransferase, yeast-specific                        | [c] : 0.01 1ag3p_sc + 0.02 dcacoa + 0.06 ddcacoa + 0.17 hdcoa + 0.09 odcycacoa + 0.24 odcacoa + 0.27 pmtcoa + 0.05 stcoa + 0.1 tdcacoa → 1.0 coa + 0.01 pa_sc |
| Heme Biosynthesis                         | 4.1.1.37  | R_UPPDC1     | false | uroporphyrinogende-carboxylase (uroporphyrinogenIII)                               | [c] : 4.0 h + uppg3 → co2 + cpppg3                                                                                                                            |
| Heme Biosynthesis                         | 4.2.1.24  | R_PPBNBS     | false | porphobilinogensynthase                                                            | [c] : 2.0 5aop → h + h2o + ppbng                                                                                                                              |
| Heme Biosynthesis                         | 4.3.1.8   | R_HMBS       | false | hydroxymethylbilanesynthase                                                        | [c] : h2o + 4.0 ppbng → 1.0 hmbil + 4.0 nh4                                                                                                                   |
| Heme Biosynthesis                         | 1.3.3.3   | R_CPPPGO     | false | coproporphyrinogenoxidase (O2required)                                             | [c] : cpppg3 + 2.0 h + o2 → co2 + h2o + pppg9                                                                                                                 |
| Glycine, Serine, and Threonine Metabolism | 2.3.1.29  | R_ALASm      | false | _5-aminolevulinatesynthase                                                         | [m] : gly + h + succoa → 5aop + co2 + coa                                                                                                                     |
| Purine and Pyrimidine Biosynthesis        | 4.2.1.70  | R_YUMPS      | true  | yUMPsynthetase                                                                     | [c] : r5p + ura <=> h2o + psd5p                                                                                                                               |
| Purine and Pyrimidine Biosynthesis        | 2.7.1.48  | R_URIK2      | false | uridinekinase (GTP:Uridine)                                                        | [c] : gtp + uri → gdp + h + ump                                                                                                                               |
| Pyrimidine Biosynthesis                   | 2.7.1.48  | R_URIK1      | false | uridinekinase (ATP:Uridine)                                                        | [c] : atp + uri → adp + h + ump                                                                                                                               |

|                                    |           |           |       |                                                          |                                                             |
|------------------------------------|-----------|-----------|-------|----------------------------------------------------------|-------------------------------------------------------------|
| Purine and Pyrimidine Biosynthesis | 2.4.2.9   | R_UPPRT   | false | uracilphosphoribosyltransferase                          | [c] : prpp + ura → ppi + ump                                |
| Nucleotides                        | 1.8.1.9   | R_TRDR    | false | thioredoxinreductase (NADPH)                             | [c] : h + nadph + trdox → nadp + trdrd                      |
| Nucleotides                        | 2.1.1.45  | R_TMDS    | false | thymidylatesynthase                                      | [c] : dump + mlthf → dhf + dtmp                             |
| Purine and Pyrimidine Biosynthesis | 3.1.4.17  | R_PDE5    | false | _3', 5'-cyclic-nucleotide-phosphodiesterase              | [c] : 35ccmp + h2o → cmp + h                                |
| Nucleotides                        | 3.1.4.17  | R_PDE4    | false | _3', 5'-cyclic-nucleotide-phosphodiesterase              | [c] : 35cgmp + h2o → gmp + h                                |
| Purine and Pyrimidine Biosynthesis | 3.1.4.17  | R_PDE3    | false | _3', 5'-cyclic-nucleotide-phosphodiesterase              | [c] : 35cimp + h2o → h + imp                                |
| Purine and Pyrimidine Biosynthesis | 3.1.4.17  | R_PDE2    | false | _3', 5'-cyclic-nucleotide-phosphodiesterase              | [c] : 35cdamp + h2o → damp + h                              |
| Nucleotides                        | 3.1.4.17  | R_PDE1    | false | _3', 5'-cyclic-nucleotide-phosphodiesterase              | [c] : camp + h2o → amp + h                                  |
| Pyrimidine Biosynthesis            | 2.4.2.10  | R_ORPT    | true  | orotatophosphoribosyltransferase                         | [c] : orot5p + ppi <=> orot + prpp                          |
| Nucleotides                        | 1.1.1.205 | R_IMP     | false | IMPdehydrogenase                                         | [c] : h2o + imp + nad → h + nadh + xmp                      |
| IMP Biosynthesis                   | 3.5.4.10  | R_IMPC    | true  | IMPcyclo-hydrolase                                       | [c] : h2o + imp <=> fprica                                  |
| Nucleotides                        | 6.3.5.2   | R_GMPS2   | false | GMPsynthase                                              | [c] : atp + gln.l + h2o + xmp → amp + glu.l + gmp + h + ppi |
| IMP Biosynthesis                   | 2.4.2.14  | R_GLUPRT  | false | glutaminephosphoribosyldiphosphate-amidotransferase      | [c] : gln.l + h2o + prpp → glu.l + ppi + pram               |
| Purine and Pyrimidine Biosynthesis | 2.7.4.8   | R_GK2     | true  | guanylatekinase (GMP:dATP)                               | [c] : datp + gmp <=> dadp + gdp                             |
| Nucleotides                        | 2.7.4.8   | R_GK1     | true  | guanylatekinase (GMP:ATP)                                | [c] : atp + gmp <=> adp + gdp                               |
| Purine and Pyrimidine Biosynthesis | 2.1.2.2   | R_GARFTi  | false | phosphoribosylglycinamideformyltransferase, irreversible | [c] : 10fthf + gar → fgam + h + thf                         |
| Purine and Pyrimidine Biosynthesis | 3.6.1.23  | R_DUTPDP  | false | dUTPdiphosphatase                                        | [c] : dutp + h2o → dump + h + ppi                           |
| Purine and Pyrimidine Biosynthesis | 3.5.2.3   | R_DHORTSn | true  | dihydroorotase, nuclear                                  | [n] : dhor.s + h2o <=> cbasp + h                            |
| Purine and Pyrimidine Biosynthesis | 1.3.3.1   | R_DHORD4  | true  | dihydrooroticacid (ubiquinone-6)                         | dhor.s[c] + q6[m] <=> orot[c] + q6h2[m]                     |
| Purine and Pyrimidine Biosynthesis | 1.3.3.1   | R_DHORD   | true  | dihydrooroticaciddehydrogenase                           | [c] : dhor.s + o2 <=> h2o2 + orot                           |
| Nucleotides                        | 2.7.4.8   | R_DGK1    | true  | deoxyguanylatekinase (dGMP:ATP)                          | [c] : atp + dgmp <=> adp + dgdp                             |
| Pyrimidine Catabolism              | 3.5.4.12  | R_DCMPDA  | true  | dCMPdeaminase                                            | [c] : dcmp + h + h2o <=> dump + nh4                         |
| Pyrimidine Catabolism              | 3.5.4.5   | R_CYTD    | false | cytidinedeaminase                                        | [c] : cytd + h + h2o → nh4 + uri                            |
| Nucleotides                        | 6.3.4.2   | R_CTSP1   | false | CTPsynthase (NH3)                                        | [c] : atp + nh4 + utp → adp + ctp + h + pi                  |
| Pyrimidine Biosynthesis            | 6.3.4.2   | R_CTSP2   | false | CTPsynthase (glutamine)                                  | [c] : atp + gln.l + h2o + utp → adp + ctp + glu.l + h + pi  |
| Pyrimidine Catabolism              | 3.5.4.1   | R_CSND    | false | Cytosinedeaminase                                        | [c] : csn + h + h2o → nh4 + ura                             |
| Purine and Pyrimidine Biosynthesis | 2.1.3.2   | R_ASPCTn  | false | aspartatecarbamoyltransferase, nuclear                   | [n] : asp.l + cbp → cbasp + h + pi                          |
| Nucleotides                        | 3.5.4.6   | R_AMPDA   | false | Adenosinemono-phosphatedeaminase                         | [c] : amp + h + h2o → imp + nh4                             |
| IMP Biosynthesis                   | 4.1.1.21  | R_AIRC    | true  | phosphoribosylaminoimidazolecarboxylase                  | [c] : air + co2 <=> 5aizc + h                               |
| IMP Biosynthesis                   | 2.1.2.3   | R_AICART  | true  | phosphoribosylaminoimidazolecarboxamideformyltransferase | [c] : 10fthf + aicar <=> fprica + thf                       |
| Nucleotides                        | 6.3.4.4   | R_ADSS    | false | adenylosuccinatesynthase                                 | [c] : asp.l + gtp + imp → dcamp + gdp + h + pi              |
| Purine and Pyrimidine Biosynthesis | 4.3.2.2   | R_ADSL2r  | true  | adenylosuccinatelyase                                    | [c] : 25aics <=> aicar + fum                                |

|                                           |           |             |       |                                                                             |                                                               |
|-------------------------------------------|-----------|-------------|-------|-----------------------------------------------------------------------------|---------------------------------------------------------------|
| Purine and Pyrimidine Biosynthesis        | 4.3.2.2   | R_ADSL1r    | true  | adenylsuccinatelyase                                                        | [c] : dcamp <=> amp + fum                                     |
| Nucleotides                               | 4.6.1.1   | R_ADNCYC    | false | adenylatecyclase                                                            | [c] : atp → camp + ppi                                        |
| Pyruvate Metabolism                       | 4.1.1.1   | R_PYRDC     | false | pyruvatedecarboxylase                                                       | [c] : h + pyr → acald + co2                                   |
| Pyruvate Metabolism                       | 4.1.3.21  | R_HCITSn    | false | homocitrate synthase                                                        | [n] : accoa + akg + h2o → coa + h + hcit                      |
| Pyruvate Metabolism                       | 4.1.3.21  | R_HCITSm    | false | homocitrate synthase                                                        | [m] : accoa + akg + h2o → coa + h + hcit                      |
| Tyrosine metabolism                       | 1.1.1.1   | R_FALDH     | true  | formaldehydedehydrogenase                                                   | [c] : fald + gthrd + nad <=> sfgluth + h + nadh               |
| Pyruvate Metabolism                       | 1.1.1.1   | R_ALCD2x    | true  | alcoholdehydrogenase (ethanol)                                              | [c] : etoh + nad <=> acald + h + nadh                         |
| Glycolysis/Gluconeogenesis                | 6.2.1.1   | R_ACS       | false | acetyl-CoAsynthetase                                                        | [c] : ac + atp + coa → accoa + amp + ppi                      |
| Glycolysis/Gluconeogenesis                | 6.2.1.1   | R_ACSm      | false | acetyl-CoAsynthetase                                                        | [m] : ac + atp + coa → accoa + amp + ppi                      |
| Pyruvate Metabolism                       | 6.2.1.1   | R_ACSp      | false | acetyl-CoAsynthetase                                                        | [x] : ac + atp + coa → accoa + amp + ppi                      |
| Quinone Biosynthesis                      | 1.14.13.- | R_OMMBLHX6m | false | _2-Octaprenyl-3-methyl-6-methoxy-1, 4-benzoquinolhydroxylase, mitochondrial | [m] : 2ommb1.5 + 0.5 o2 → 2omhmb1.5                           |
| Quinone Biosynthesis                      | 2.5.1.-   | R_HBZOPT6m  | false | Hydroxybenzoateoctaprenyl-[m] transferase, mitochondrial                    | [m] : 4hbz + octdp.5 → 3ophb.5 + ppi                          |
| Quinone Biosynthesis                      | 2.5.1.-   | R_HBZOPT6   | false | Hydroxybenzoateoctaprenyl-[c] transferase                                   | [c] : 4hbz + octdp.5 → 3ophb.5 + ppi                          |
| Quinone Biosynthesis                      | 4.1.3.-   | R_CHRPL     | false | Chorismatepyruvatelyase                                                     | [c] : chor → 4hbz + pyr                                       |
| Riboflavin Metabolism                     | 1.1.1.193 | R_DHPPDA    | false | diaminohydroxyphosphoribosylaminopyrimidinedeaminase                        | [c] : 25dhpp + h + h2o → 5apru + nh4                          |
| Riboflavin Metabolism                     | 1.1.1.193 | R_APRAUR    | false | _5-amino-6- (5-phosphoribosylamino)uracil-reductase                         | [c] : 5apru + h + nadph → 5aprbu + nadp                       |
| Riboflavin Metabolism                     | 3.1.3.2   | R_ACP1e     | false | acidphosphatase, extracellular (secreted)                                   | [e] : fmn + h2o → pi + ribflv                                 |
| Starch and Sucrose Metabolism             | 3.2.1.58  | R_13BGHe    | false | Exo-1, 3-beta-glucanoglucosylase                                            | [e] : 13bdglen + h2o → glic.d                                 |
| Thiamine Metabolism                       | 2.5.1.3   | R_TMPPP     | false | thiamine-phosphatediphosphorylase                                           | [c] : 2mahmp + 4mpetz + h → ppi + thmmp                       |
| Thiamine Metabolism                       | 3.1.3.2   | R_THMPe     | false | thiaminphosphatase, extracellular                                           | [e] : h2o + thmmp → pi + thm                                  |
| Thiamine Metabolism                       | 3.1.3.2   | R_THMDPe    | false | thiamindiphosphatase, extracellular                                         | [e] : 2.0 h2o + thmpp → h + pi + thm                          |
| Thiamine Metabolism                       | 2.7.4.7   | R_PMPK      | false | phosphomethylpyrimidinekinase                                               | [c] : 4ampm + atp → 2mahmp + adp                              |
| Thiamine Metabolism                       | 2.7.1.49  | R_HMPK1     | false | hydroxymethylpyrimidinekinase (ATP)                                         | [c] : 4ahmmp + atp → 4ampm + adp + h                          |
| Thiamine Metabolism                       | 2.5.1.3   | R_HETZK     | false | hydroxyethylthiazolekinase                                                  | [c] : 4mhetz + atp → 4mpetz + adp + h                         |
| Threonine and Lysine Metabolism           | 6.1.1.3   | R_THRTRS    | false | Threonyl-tRNA synthetase                                                    | [c] : atp + thr.l + trnathr → amp + ppi + thrtrna             |
| Threonine and Lysine Metabolism           | 6.1.1.3   | R_THRTRSm   | false | threonyl-tRNA synthetase, mitochondrial                                     | [m] : atp + thr.l + trnathr → amp + ppi + thrtrna             |
| Glycine, Serine, and Threonine Metabolism | 4.2.3.1   | R_THRS      | false | threoninesynthase                                                           | [c] : h2o + phom → pi + thr.l                                 |
| Glycine, Serine, and Threonine Metabolism | 4.2.1.16  | R_THRD_L    | false | L-threoninedeaminase                                                        | [c] : thr.l → 2obut + nh4                                     |
| Threonine and Lysine Metabolism           | 4.2.1.16  | R_THRD_Lm   | false | L-threoninedeaminase, mitochondrial                                         | [m] : thr.l → 2obut + nh4                                     |
| Threonine and Lysine Metabolism           | 4.1.2.5   | R_THRA      | false | Threoninealdolase                                                           | [c] : acald + gly → thr.l                                     |
| Threonine and Lysine Metabolism           | 1.5.1.7   | R_SACCD2    | true  | saccharopinedehydrogenase (NAD, L-lysineforming)                            | [c] : h2o + nad + saccrp.l <=> akg + h + lys.l + nadh         |
| Threonine and Lysine Metabolism           | 1.5.1.10  | R_SACCD1    | true  | saccharopinedehydrogenase (NADP, L-glutamateforming)                        | [c] : l2aadp6sa + glu.l + h + nadph <=> h2o + nadp + saccrp.l |
| Threonine and Lysine Metabolism           | .         | R_OXAGm     | true  | non-enzymaticreaction                                                       | [m] : h + oxag <=> 2oxoadp + co2                              |
| Threonine and Lysine Metabolism           | 4.2.1.79  | R_MCITDm    | true  | _2-methyl-citratatedehydratase, mitochondrial                               | [m] : hcit <=> b124tc + h2o                                   |
| Threonine and Lysine Metabolism           | 6.1.1.6   | R_LYSTRSm   | false | Lysyl-tRNA synthetase, mitochondrial                                        | [m] : atp + lys.l + trnalyt → amp + lystrna + ppi             |

|                                 |           |                  |       |                                                                 |                                                               |
|---------------------------------|-----------|------------------|-------|-----------------------------------------------------------------|---------------------------------------------------------------|
| Threonine and Lysine Metabolism | 6.1.1.6   | R_LYSTRS         | false | Lysyl-tRNA synthetase                                           | [c] : atp + lys_l + trnals → amp + lystrna + ppi              |
| Threonine and Lysine Metabolism | 1.1.1.155 | R_HICITDm        | true  | homoisocitrate dehydrogenase                                    | [m] : hicit + nad <=> h + nadh + oxag                         |
| Threonine and Lysine Metabolism | 4.2.1.36  | R_HACNHm         | true  | homoaccontinate hydratase, mitochondrial                        | [m] : b124tc + h2o <=> hicit                                  |
| Threonine and Lysine Metabolism | 2.6.1.39  | R_AAATA          | true  | _2-aminoadipate transaminase                                    | [c] : 2oxoadp + glu_l <=> l2aadp + akg                        |
| Threonine and Lysine Metabolism | 1.2.1.31  | R_AASAD1         | false | L-aminoadipate-semialdehyde dehydrogenase (NADPH)               | [c] : l2aadp + atp + h + nadph → l2aadp6sa + amp + nadp + ppi |
| Threonine and Lysine Metabolism | 1.2.1.31  | R_AASAD2         | false | L-aminoadipate-semialdehyde dehydrogenase (NADH)                | [c] : l2aadp + atp + h + nadh → l2aadp6sa + amp + nad + ppi   |
| Threonine and Lysine Metabolism | 4.2.99.2  | R_4HTHRS         | false | _4-Hydroxy-L-threonine synthase                                 | [c] : h2o + phthr → 4hthr + pi                                |
| Transport, Extracellular        | .         | R_VALt2r         | true  | L-valine reversible transport via proton symport                | h[e] + val_l[e] <=> h[c] + val_l[c]                           |
| Transport, Extracellular        | .         | R_URIt2          | false | uridine transport via proton symport                            | h[e] + uri[e] → h[c] + uri[c]                                 |
| Transport, Extracellular        | .         | R_UREA2t2        | true  | urea reversible transport via proton symport (2H <sup>+</sup> ) | 2.0 h[e] + urea[e] <=> h[c] + urea[c]                         |
| Transport, Extracellular        | .         | R_URAt2          | false | uracil transport via proton symport                             | h[e] + ura[e] → h[c] + ura[c]                                 |
| Transport, Extracellular        | .         | R_TYRt2r         | true  | L-tyrosine reversible transport via proton symport              | h[e] + tyr_l[e] <=> h[c] + tyr_l[c]                           |
| Transport, Extracellular        | .         | R_TRPt2r         | true  | L-tryptophan reversible transport via proton symport            | h[e] + trp_l[e] <=> h[c] + trp_l[c]                           |
| Transport, Extracellular        | .         | R_THRt2r         | true  | L-threonine reversible transport via proton symport             | h[e] + thr_l[e] <=> h[c] + thr_l[c]                           |
| Transport, Extracellular        | .         | R_THMt2          | false | Thiamine transport via proton symport                           | h[e] + thm[e] → h[c] + thm[c]                                 |
| Transport, Extracellular        | .         | R_SO4ti          | false | sulfate irreversible uniport                                    | so4[e] → so4[c]                                               |
| Transport, Extracellular        | .         | R_SERt2r         | true  | L-serine reversible transport via proton symport                | h[e] + ser_l[e] <=> h[c] + ser_l[c]                           |
| Transport, Extracellular        | .         | R_PYRt2          | false | pyruvate transport via proton symport                           | h[e] + pyr[e] → h[c] + pyr[c]                                 |
| Transport, Extracellular        | .         | R_PROt2r         | true  | L-proline reversible transport via proton symport               | h[e] + pro_l[e] <=> h[c] + pro_l[c]                           |
| Transport, Extracellular        | .         | R_PNTOt2         | true  | Pantothenate reversible transport via proton symport            | h[e] + pnto_r[e] <=> h[c] + pnto_r[c]                         |
| Transport, Extracellular        | .         | R_PIt2r          | true  | phosphate reversible transport via symport                      | h[e] + pi[e] <=> h[c] + pi[c]                                 |
| Transport, Extracellular        | .         | R_PHEt2r         | true  | L-phenylalanine reversible transport via proton symport         | h[e] + phe_l[e] <=> h[c] + phe_l[c]                           |
| Transport, Extracellular        | .         | R_ORNt2r         | true  | ornithine reversible transport via proton symport               | h[e] + orn[e] <=> h[c] + orn[c]                               |
| Transport, Extracellular        | .         | R_METt2r         | true  | L-methionine reversible transport via proton symport            | h[e] + met_l[e] <=> h[c] + met_l[c]                           |
| Transport, Extracellular        | .         | R_MANt2          | false | D-mannose transport via proton symport                          | h[e] + man[e] → h[c] + man[c]                                 |
| Transport, Extracellular        | .         | R_MALTt2         | false | maltose transport via proton symport                            | h[e] + malt[e] → h[c] + malt[c]                               |
| Transport, Extracellular        | .         | R_LYSt2r         | true  | L-lysine reversible transport via proton symport                | h[e] + lys_l[e] <=> h[c] + lys_l[c]                           |
| Transport, Extracellular        | .         | R_LEUt2r         | true  | L-leucine reversible transport via proton symport               | h[e] + leu_l[e] <=> h[c] + leu_l[c]                           |
| Transport, Extracellular        | .         | R_L-DASH-LACTt2r | true  | L-lactate reversible transport via proton symport               | h[e] + lac_l[e] <=> h[c] + lac_l[c]                           |
| Transport, Extracellular        | .         | R_INSTt2         | false | inositol transport via proton symport                           | h[e] + inost[e] → h[c] + inost[c]                             |
| Transport, Extracellular        | .         | R_ILEt2r         | true  | L-isoleucine reversible transport via proton symport            | h[e] + ile_l[e] <=> h[c] + ile_l[c]                           |

|                          |          |            |       |                                                               |                                                        |
|--------------------------|----------|------------|-------|---------------------------------------------------------------|--------------------------------------------------------|
| Transport, Extracellular |          | R_HIS2r    | true  | L-histidine reversible transport via proton-symport           | $h[e] + his\_l[e] \rightleftharpoons h[c] + his\_l[c]$ |
| Transport, Extracellular |          | R_GUA2r    | true  | guaniner reversible transport via proton-symport              | $gua[e] + h[e] \rightleftharpoons gua[c] + h[c]$       |
| Transport, Extracellular |          | R_GTHOXti  | false | oxidized glutathione irreversible uniport                     | $gthox[e] \rightarrow gthox[c]$                        |
| Transport, Extracellular |          | R_GLY2r    | true  | glyciner reversible transport via proton-symport              | $gly[e] + h[e] \rightleftharpoons gly[c] + h[c]$       |
| Transport, Extracellular |          | R_GLU2r    | true  | L-glutamate transport via protons symport, reversible         | $glu\_l[e] + h[e] \rightleftharpoons glu\_l[c] + h[c]$ |
| Transport, Extracellular |          | R_GLN2r    | true  | L-glutamine reversible transport via proton-symport           | $gln\_l[e] + h[e] \rightleftharpoons gln\_l[c] + h[c]$ |
| Transport, Extracellular |          | R_GLCt1    | false | glucose transport (uniport)                                   | $glc\_d[e] \rightarrow glc\_d[c]$                      |
| Transport, Extracellular |          | R_GALt2    | false | D-galactose transport via protons symport                     | $gal[e] + h[e] \rightarrow gal[c] + h[c]$              |
| Transport, Extracellular |          | R_FRU2t    | false | D-fructose transport via protons symport                      | $fru[e] + h[e] \rightarrow fru[c] + h[c]$              |
| Transport, Extracellular |          | R_CYST2r   | true  | L-cysteine reversible transport via proton-symport            | $cys\_l[e] + h[e] \rightleftharpoons cys\_l[c] + h[c]$ |
| Transport, Extracellular |          | R_CSNT2    | false | cytosine transport via protons symport                        | $csn[e] + h[e] \rightarrow csn[c] + h[c]$              |
| Transport, Extracellular |          | R_CRNt     | true  | L-carnitine reversible transport                              | $crn[e] \rightleftharpoons crn[c]$                     |
| Transport, Extracellular |          | R_BTNT2i   | false | Biotin uptake                                                 | $btn[e] + h[e] \rightarrow btn[c] + h[c]$              |
| Transport, Extracellular | 3.6.1.35 | R_ATPS     | false | ATPase, cytosolic                                             | $atp[c] + h_2o[c] \rightarrow adp[c] + h[e] + pi[c]$   |
| Transport, Extracellular |          | R_ASP2r    | true  | L-aspartate reversible transport via proton-symport           | $asp\_l[e] + h[e] \rightleftharpoons asp\_l[c] + h[c]$ |
| Transport, Extracellular |          | R_ASNT2r   | true  | L-asparagine reversible transport via proton-symport          | $asn\_l[e] + h[e] \rightleftharpoons asn\_l[c] + h[c]$ |
| Transport, Extracellular |          | R_ARG2r    | true  | L-arginine reversible transport via proton-symport            | $arg\_l[e] + h[e] \rightleftharpoons arg\_l[c] + h[c]$ |
| Transport, Extracellular |          | R_AMET2t   | false | S-adenosyl-L-methionine transport via protons symport         | $amet[e] + h[e] \rightarrow amet[c] + h[c]$            |
| Transport, Extracellular |          | R_ALLTti   | false | allantoate irreversible uniport                               | $alltt[e] \rightarrow alltt[c]$                        |
| Transport, Extracellular |          | R_ALLTNTi  | false | allantoin irreversible uniport                                | $alltn[e] \rightarrow alltn[c]$                        |
| Transport, Extracellular |          | R_ALAt2r   | true  | L-alanine reversible transport via proton-symport             | $ala\_l[e] + h[e] \rightleftharpoons ala\_l[c] + h[c]$ |
| Transport, Extracellular |          | R_ACT2r    | true  | acetate reversible transport via proton-symport               | $ac[e] + h[e] \rightleftharpoons ac[c] + h[c]$         |
| Transport, Extracellular |          | R_ABUT2t   | false | _4-aminobutyrate transport via proton-symport                 | $4abut[e] + h[e] \rightarrow 4abut[c] + h[c]$          |
| Transport, Extracellular |          | R_5AOP2t   | false | _5-Aminolevulinate transport via proton-symport               | $5aop[e] + h[e] \rightarrow 5aop[c] + h[c]$            |
| Transport, Mitochondrial |          | R_VALt2m   | true  | Valine reversible mitochondrial transport via protons symport | $h[c] + val\_l[c] \rightleftharpoons h[m] + val\_l[m]$ |
| Transport, Mitochondrial |          | R_TYRt2m   | true  | tyrosine mitochondrial transport via proton-symport           | $h[c] + tyr\_l[c] \rightleftharpoons h[m] + tyr\_l[m]$ |
| Transport, Mitochondrial |          | R_TRPt2m   | true  | tryptophan mitochondrial transport via proton-symport         | $h[c] + trp\_l[c] \rightleftharpoons h[m] + trp\_l[m]$ |
| Transport, Mitochondrial |          | R_THRt2m   | true  | threonine mitochondrial transport via proton-symport          | $h[c] + thr\_l[c] \rightleftharpoons h[m] + thr\_l[m]$ |
| Transport, Mitochondrial |          | R_SUCFUMtm | false | succinate-fumarate transport, mitochondrial                   | $fum[m] + succ[c] \rightarrow fum[c] + succ[m]$        |
| Transport, Mitochondrial |          | R_SUCCtm   | false | succinate transport, mitochondrial                            | $pi[m] + succ[c] \rightarrow pi[c] + succ[m]$          |
| Transport, Mitochondrial |          | R_PYRt2m   | true  | pyruvate mitochondrial transport via proton-symport           | $h[c] + pyr[c] \rightleftharpoons h[m] + pyr[m]$       |

|                          |                |       |                                                                |                                                                                                       |
|--------------------------|----------------|-------|----------------------------------------------------------------|-------------------------------------------------------------------------------------------------------|
| Transport, Mitochondrial | R_PROtm        | true  | L-prolinetransport, mitochondrial                              | $\text{pro.l[c]} \rightleftharpoons \text{pro.l[m]}$                                                  |
| Transport, Mitochondrial | R_PIt5m        | true  | phosphatetransport-viahydroxideionsymport, mitochondrial       | $\text{oh1[m]} + \text{pi[c]} \rightleftharpoons \text{oh1[c]} + \text{pi[m]}$                        |
| Transport, Mitochondrial | R_PIt2m        | true  | phosphatetransporter, mitochondrial                            | $\text{h[c]} + \text{pi[c]} \rightleftharpoons \text{h[m]} + \text{pi[m]}$                            |
| Transport, Mitochondrial | R_PHEt2m       | true  | Phenylalaninemitochondrial-transportviaproton-symport          | $\text{h[m]} + \text{phe.l[m]} \rightleftharpoons \text{h[c]} + \text{phe.l[c]}$                      |
| Transport, Mitochondrial | R_OXO2Ctm      | true  | _2-oxodicarboylate-transporter, mitochondrial                  | $\text{akg[m]} + \text{oxag[c]} \rightleftharpoons \text{akg[c]} + \text{oxag[m]}$                    |
| Transport, Mitochondrial | R_ORNt3m       | true  | ornithinemitochondrial-transportviaproton-antiport             | $\text{h[c]} + \text{orn[m]} \rightleftharpoons \text{h[m]} + \text{orn[c]}$                          |
| Transport, Mitochondrial | R_OAAt2m       | true  | oxaloacetatetransport, mitochondrial                           | $\text{h[c]} + \text{oaa[c]} \rightleftharpoons \text{h[m]} + \text{oaa[m]}$                          |
| Transport, Mitochondrial | R_METt2m       | true  | methioninemitochondrial-transportviaproton-symport             | $\text{h[m]} + \text{met.l[m]} \rightleftharpoons \text{h[c]} + \text{met.l[c]}$                      |
| Transport, Mitochondrial | R_MALtm        | true  | malatetransport, mitochondrial                                 | $\text{mal.l[c]} + \text{pi[m]} \rightleftharpoons \text{mal.l[m]} + \text{pi[c]}$                    |
| Transport, Mitochondrial | R_HIS2m        | true  | histidinemitochondrial-transportviaproton-symport              | $\text{h[m]} + \text{his.l[m]} \rightleftharpoons \text{h[c]} + \text{his.l[c]}$                      |
| Transport, Mitochondrial | R_GLUt5m       | false | L-glutamatreansport-viahydroxideionantiport                    | $\text{glu.l[c]} + \text{oh1[m]} \rightarrow \text{glu.l[m]} + \text{oh1[c]}$                         |
| Transport, Mitochondrial | R_GLUt2m       | true  | L-glutamaterversible-transportviaproton-symport, mitochondrial | $\text{glu.l[c]} + \text{h[c]} \rightleftharpoons \text{glu.l[m]} + \text{h[m]}$                      |
| Transport, Mitochondrial | R_FADFMNtm     | false | FAD/FMNantiport                                                | $\text{fad[c]} + \text{fmn[m]} \rightarrow \text{fad[m]} + \text{fmn[c]}$                             |
| Transport, Mitochondrial | R_E4Ptm        | true  | D-erythrose4--phosphate-mitochondrialtransport-viadiffusion    | $\text{e4p[c]} \rightleftharpoons \text{e4p[m]}$                                                      |
| Transport, Mitochondrial | R_DICtm        | true  | dicarboxylatetransport, mitochondrial                          | $\text{mal.l[c]} + \text{succ[m]} \rightleftharpoons \text{mal.l[m]} + \text{succ[c]}$                |
| Transport, Mitochondrial | R_CRNCARtm     | false | carnithine-acetylcarnithinecarrier, mitochondrial              | $\text{acrn[c]} + \text{crn[m]} \rightarrow \text{acrn[m]} + \text{crn[c]}$                           |
| Transport, Mitochondrial | R_CITtcm       | true  | citratetransport, mitochondrial                                | $\text{cit[c]} + \text{icit[m]} \rightleftharpoons \text{cit[m]} + \text{icit[c]}$                    |
| Transport, Mitochondrial | R_CITtbm       | true  | citratetransport, mitochondrial                                | $\text{cit[c]} + \text{pep[m]} \rightleftharpoons \text{cit[m]} + \text{pep[c]}$                      |
| Transport, Mitochondrial | R_CITtam       | true  | citratetransport, mitochondrial                                | $\text{cit[c]} + \text{mal.l[m]} \rightleftharpoons \text{cit[m]} + \text{mal.l[c]}$                  |
| Transport, Mitochondrial | R_ATPtm_DASH_H | false | ADP/ATPtransporter, mitochondrial                              | $\text{adp[c]} + \text{atp[m]} + \text{h[c]} \rightarrow \text{adp[m]} + \text{atp[c]} + \text{h[m]}$ |
| Transport, Mitochondrial | R_ASPT2m       | true  | aspartatemitochondrial-transportviaproton-symport              | $\text{asp.l[c]} + \text{h[c]} \rightleftharpoons \text{asp.l[m]} + \text{h[m]}$                      |
| Transport, Mitochondrial | R_ASNt2m       | true  | asparaginemitochondrial-transportviaproton-transport           | $\text{asn.l[c]} + \text{h[c]} \rightleftharpoons \text{asn.l[m]} + \text{h[m]}$                      |
| Transport, Mitochondrial | R_ARGt2m       | true  | argininemitochondrial-transportviaproton-symport               | $\text{arg.l[c]} + \text{h[c]} \rightleftharpoons \text{arg.l[m]} + \text{h[m]}$                      |
| Transport, Mitochondrial | R_AMETtm       | true  | S-Adenosyl-L-methioninereversible-transport, mitochondrial     | $\text{amet[c]} \rightleftharpoons \text{amet[m]}$                                                    |
| Transport, Mitochondrial | R_AHCYSTm      | true  | S-adenosyl-L-homocysteinereversible-transport, mitochondrial   | $\text{ahcys[c]} \rightleftharpoons \text{ahcys[m]}$                                                  |
| Transport, Mitochondrial | R_ACTm         | true  | acetatetransport, mitochondrial                                | $\text{ac[c]} \rightleftharpoons \text{ac[m]}$                                                        |
| Transport, Mitochondrial | R_4ABUTNtm     | true  | _4-aminobutanalmitochondrial-transportviadiffusion             | $\text{4abutn[c]} \rightleftharpoons \text{4abutn[m]}$                                                |
| Transport, Mitochondrial | R_4ABUTtm      | true  | _4-aminobutanoatemitochondrial-transportviadiffusion           | $\text{4abut[c]} \rightleftharpoons \text{4abut[m]}$                                                  |
| Transport, Mitochondrial | R_3MOPtm       | true  | _3-Methyl-2-oxopentanoate-transport, diffusion, mitochondrial  | $\text{3mop[c]} \rightleftharpoons \text{3mop[m]}$                                                    |



|                                                    |         |             |       |                                                                                         |                                                               |
|----------------------------------------------------|---------|-------------|-------|-----------------------------------------------------------------------------------------|---------------------------------------------------------------|
| Transport, Mitochondrial                           |         | R_3MOBtm    | true  | _3-methyl-2-oxobutanoate transport, diffusion, mitochondrial                            | $3mob[c] \rightleftharpoons 3mob[m]$                          |
| Transport, Mitochondrial                           |         | R_3C4MOPtm  | true  | _3-Carboxy-4-methyl-2-oxopentanoate transport, diffusion, mitochondrial                 | $3c4mop[c] \rightleftharpoons 3c4mop[m]$                      |
| Transport, Mitochondrial                           |         | R_3C3HMPtm  | true  | _2-Isopropylmalate transport, diffusion, mitochondrial                                  | $3c3hmp[c] \rightleftharpoons 3c3hmp[m]$                      |
| Transport, Mitochondrial                           |         | R_34HPPt2m  | true  | _3-(4-hydroxyphenyl)pyruvate mitochondrial transport via proton-symport                 | $34hpp[c] + h[c] \rightleftharpoons 34hpp[m] + h[m]$          |
| Transport, Mitochondrial                           |         | R_2OXOADPtm | false | _2-oxoadipate transport-out of mitochondrial via diffusion                              | $2oxoadp[m] \rightarrow 2oxoadp[c]$                           |
| Transport, Mitochondrial                           |         | R_2DDA7Ptm  | true  | _2-Dehydro-3-deoxy-D-arabino-heptonate 7-phosphat mitochondrial transport via diffusion | $2dda7p[c] \rightleftharpoons 2dda7p[m]$                      |
| Transport, Nuclear                                 |         | R_PIt2n     | true  | phosphate nuclear transport via proton-symport                                          | $h[c] + pi[c] \rightleftharpoons h[n] + pi[n]$                |
| Transport, Nuclear                                 |         | R_H2Otn     | true  | H2O transport, nuclear                                                                  | $h2o[n] \rightleftharpoons h2o[c]$                            |
| Transport, Nuclear                                 |         | R_GLUt2n    | true  | glutamate nuclear transport via proton-symport                                          | $glu.l[c] + h[c] \rightleftharpoons glu.l[n] + h[n]$          |
| Transport, Nuclear                                 |         | R_GLNt2n    | true  | glutamine nuclear transport via proton-symport                                          | $gln.l[c] + h[c] \rightleftharpoons gln.l[n] + h[n]$          |
| Transport, Nuclear                                 |         | R_CO2tn     | true  | CO2 nuclear transport via diffusion                                                     | $co2[n] \rightleftharpoons co2[c]$                            |
| Transport, Nuclear                                 |         | R_CBptn     | true  | carbamoyl phosphate nuclear transport via diffusion                                     | $cbp[c] \rightleftharpoons cbp[n]$                            |
| Transport, Peroxisomal                             |         | R_TYRt2p    | true  | tyrosine peroxisomal transport via proton-symport                                       | $h[c] + tyr.l[c] \rightleftharpoons h[x] + tyr.l[x]$          |
| Transport, Peroxisomal                             |         | R_HCYSt2p   | true  | Homocysteine peroxisomal transport via proton-symport                                   | $h[c] + hcys.l[c] \rightleftharpoons h[x] + hcys.l[x]$        |
| Transport, Peroxisomal                             |         | R_34HPPt2p  | true  | _3-(4-hydroxyphenyl)pyruvate peroxisomal transport via proton-symport                   | $34hpp[c] + h[c] \rightleftharpoons 34hpp[x] + h[x]$          |
| Transport, Peroxisomal                             |         | R_CYSTp     | true  | cystathione peroxisomal transport                                                       | $cyst.l[c] \rightleftharpoons cyst.l[x]$                      |
| Tyrosine, Tryptophan, and Phenylalanine Metabolism | 6.1.1.1 | R_TYRTRSm   | false | tyrosyl-tRNA synthetase, mitochondrial                                                  | $[m] : atp + trnatyr + tyr.l \rightarrow amp + ppi + tyrtrna$ |
| Tyrosine, Tryptophan, and Phenylalanine Metabolism | 6.1.1.1 | R_TYRTRS    | false | tyrosyl-tRNA synthetase                                                                 | $[c] : atp + trnatyr + tyr.l \rightarrow amp + ppi + tyrtrna$ |
| Tyrosine, Tryptophan, and Phenylalanine Metabolism | 2.6.1.1 | R_TYRTAp    | true  | tyrosine transaminase, peroxisomal                                                      | $[x] : akp + tyr.l \rightleftharpoons 34hpp + glu.l$          |
| Tyrosine metabolism                                | 2.6.1.1 | R_TYRTA     | true  | tyrosine transaminase                                                                   | $[c] : akp + tyr.l \rightleftharpoons 34hpp + glu.l$          |
| Tyrosine metabolism                                | 2.6.1.1 | R_TYRTAm    | true  | tyrosine transaminase, mitochondrial                                                    | $[m] : akp + tyr.l \rightleftharpoons 34hpp + glu.l$          |
| Tyrosine, Tryptophan, and Phenylalanine Metabolism | 2.6.1.- | R_TYRTAi    | false | tyrosine transaminase, irreversible                                                     | $[c] : 34hpp + glu.l \rightarrow akp + tyr.l$                 |
| Tyrosine, Tryptophan, and Phenylalanine Metabolism | 6.1.1.2 | R_TRPTRSm   | false | Tryptophanyl-tRNA synthetase, mitochondrial                                             | $[m] : atp + trnatrp + trp.l \rightarrow amp + ppi + trptrna$ |
| Tyrosine, Tryptophan, and Phenylalanine Metabolism | 6.1.1.2 | R_TRPTRS    | false | Tryptophanyl-tRNA synthetase                                                            | $[c] : atp + trnatrp + trp.l \rightarrow amp + ppi + trptrna$ |

|                                                    |            |           |       |                                                             |                                                    |
|----------------------------------------------------|------------|-----------|-------|-------------------------------------------------------------|----------------------------------------------------|
| Tyrosine, Tryptophan, and Phenylalanine Metabolism | 4.2.1.20   | R_TRPS1   | false | tryptophansynthase (indoleglycerol-phosphate)               | [c] : 3ig3p + ser_l → g3p + h2o + trp_l            |
| Tryptophan metabolism                              | 1.13.11.11 | R_TRPO2   | false | L-Tryptophan:oxygen2, 3-oxidoreductase (deacylizing)        | [c] : o2 + trp_l → lfmkynr                         |
| Tyrosine, Tryptophan, and Phenylalanine Metabolism | 1.1.1.25   | R_SHK3D   | false | shikimate dehydrogenase                                     | [c] : 3dhsk + h + nadph → nadp + skm               |
| Tyrosine, Tryptophan, and Phenylalanine Metabolism | 2.7.1.71   | R_SHKK    | false | shikimate kinase                                            | [c] : atp + skm → adp + h + skm5p                  |
| Tyrosine, Tryptophan, and Phenylalanine Metabolism | 2.5.1.19   | R_PSCVTi  | false | _3-phosphoshikimate1-carboxyvinyl-transferase, irreversible | [c] : pep + skm5p → 3psme + pi                     |
| Tyrosine, Tryptophan, and Phenylalanine Metabolism | 5.3.1.24   | R_PRAIi   | false | phosphoribosylanthranilate isomerase (irreversible)         | [c] : pran → 2cpr5p                                |
| Tyrosine, Tryptophan, and Phenylalanine Metabolism | 1.3.1.12   | R_PPND    | false | prephenate dehydrogenase                                    | [c] : nad + pphn → 34hpp + co2 + nadh              |
| Tyrosine, Tryptophan, and Phenylalanine Metabolism | 1.3.1.13   | R_PPND2   | false | prephenate dehydrogenase (NADP)                             | [c] : nadp + pphn → 34hpp + co2 + nadph            |
| Tyrosine, Tryptophan, and Phenylalanine Metabolism | 4.2.1.51   | R_PPNDH   | false | prephenate dehydratase                                      | [c] : h + pphn → co2 + h2o + phpyr                 |
| Tyrosine, Tryptophan, and Phenylalanine Metabolism | 6.1.1.20   | R_PHETRSm | false | phenylalanyl-tRNA synthetase, mitochondrial                 | [m] : atp + phe_l + trnaphe → amp + phetrna + ppi  |
| Tyrosine, Tryptophan, and Phenylalanine Metabolism | 6.1.1.20   | R_PHETRS  | false | Phenylalanyl-tRNA synthetase                                | [c] : atp + phe_l + trnaphe → amp + phetrna + ppi  |
| Phenylalanine metabolism                           | 2.6.1.1    | R_PHETA1  | true  | phenylalanine transaminase                                  | [c] : akglu + phe_l <=> glu_l + phpyr              |
| Tryptophan metabolism                              | 4.1.1.45   | R_PCLAD   | false | picolinic acid de-carboxylase                               | [c] : cmusa + h → am6sa + co2                      |
| Tyrosine metabolism                                | 5.2.1.2    | R_MACACI  | false | maleylacetoacetate isomerase                                | [c] : 4mlacac → 4fumacac                           |
| Tryptophan metabolism                              | 1.14.13.9  | R_KYN3OX  | false | kynurenine 3-monooxygenase                                  | [c] : lkynr + h + nadph + o2 → h2o + hlkynr + nadp |
| Tryptophan metabolism                              | 3.7.1.3    | R_KYN     | false | kynureninase                                                | [c] : lkynr + h2o → ala_l + anth + h               |
| Tyrosine, Tryptophan, and Phenylalanine Metabolism | 4.1.1.74   | R_INDPYRD | true  | Indole-3-pyruvate de-carboxylase                            | [c] : h + indpyr <=> co2 + id3acald                |
| Tyrosine, Tryptophan, and Phenylalanine Metabolism | 4.1.1.48   | R_IGPS    | false | indole-3-glycerol-phosphatesynthase                         | [c] : 2cpr5p + h → 3ig3p + co2 + h2o               |
| Tryptophan metabolism                              | 3.7.1.3    | R_HKYNH   | false | _3-Hydroxy-L-kynurenine-hydrolase                           | [c] : h2o + hlkynr → 3hanthr + ala_l               |
| Tyrosine metabolism                                | 1.13.11.5  | R_HGNTOR  | false | Homogentisate:oxygen1, 2-oxidoreductase (deacylizing)       | [c] : hgntis + o2 → 4mlacac + h                    |
| Tyrosine metabolism                                | 3.7.1.2    | R_FUMAC   | false | fumarylacetoacetase                                         | [c] : 4fumacac + h2o → acac + fum + h              |
| Tryptophan metabolism                              | 3.5.1.9    | R_FKYNH   | false | N-Formyl-L-kynurenine amido-hydrolase                       | [c] : lfmkynr + h2o → lkynr + for + h              |

|                                                    |            |            |       |                                                                       |                                                  |
|----------------------------------------------------|------------|------------|-------|-----------------------------------------------------------------------|--------------------------------------------------|
| Tyrosine, Tryptophan, and Phenylalanine Metabolism | 4.2.1.10   | R_DHQTi    | false | _3-dehydroquinatedehydratase, irreversible                            | [c] : 3dhq → 3dhsq + h2o                         |
| Tyrosine, Tryptophan, and Phenylalanine Metabolism | 4.6.1.3    | R_DHQs     | false | _3-dehydroquinatesynthase                                             | [c] : 2dda7p → 3dhq + pi                         |
| Tyrosine, Tryptophan, and Phenylalanine Metabolism | 4.1.2.15   | R_DDPAm    | false | _2-deoxy-D-arabino-heptulosonate7--phosphatesynthetase, mitochondrial | [m] : e4p + h2o + pep → 2dda7p + pi              |
| Tyrosine, Tryptophan, and Phenylalanine Metabolism | 4.1.2.15   | R_DDPa     | false | _3-deoxy-D-arabino-heptulosonate7--phosphatesynthetase                | [c] : e4p + h2o + pep → 2dda7p + pi              |
| Tyrosine, Tryptophan, and Phenylalanine Metabolism | 4.2.3.5    | R_CHORS    | false | chorismatesynthase                                                    | [c] : 3psme → chor + pi                          |
| Tyrosine, Tryptophan, and Phenylalanine Metabolism | 5.4.99.5   | R_CHORM    | false | chorismatemutase                                                      | [c] : chor → pphn                                |
| Tyrosine, Tryptophan, and Phenylalanine Metabolism | 2.4.2.18   | R_ANPRT    | false | anthranilatephosphoribosyltransferase                                 | [c] : anth + prpp → ppi + pran                   |
| Tyrosine, Tryptophan, and Phenylalanine Metabolism | 3.5.1.4    | R_AMID3    | false | amidase                                                               | [c] : h2o + iad → ind3ac + nh4                   |
| Tyrosine, Tryptophan, and Phenylalanine Metabolism | 3.5.1.4    | R_AMID2    | false | amidase                                                               | [c] : h2o + pad → nh4 + pac                      |
| Tryptophan metabolism                              | 1.2.1.32   | R_AM6SAD   | false | aminomuconate-semialdehydedehydrogenase                               | [c] : am6sa + h2o + nad → amuco + h + nadh       |
| Glycolysis/Gluconeogenesis                         | 1.2.1.3    | R_ALDD2y   | false | aldehydedehydrogenase (acetaldehyde, NADP)                            | [c] : acald + h2o + nadp → ac + h + nadph        |
| Tyrosine, Tryptophan, and Phenylalanine Metabolism | 1.2.1.3    | R_ALDD2ym  | false | aldehydedehydrogenase (acetylaldehyde, NADP), mitochondrial           | [m] : acald + h2o + nadp → ac + h + nadph        |
| Glycolysis/Gluconeogenesis                         | 1.2.1.3    | R_ALDD2xm  | false | aldehydedehydrogenase (acetylaldehyde, NAD), mitochondrial            | [m] : acald + h2o + nad → ac + h + nadh          |
| Tryptophan metabolism                              | 1.2.1.3    | R_ALDD20xm | false | aldehydedehydrogenase (indole-3-acetaldehyde, NAD), mitochondrial     | [m] : h2o + id3acald + nad → h + ind3ac + nadh   |
| Tyrosine, Tryptophan, and Phenylalanine Metabolism | 1.2.1.3    | R_ALDD20ym | false | aldehydedehydrogenase (indole-3-acetaldehyde, NADP), mitochondrial    | [m] : h2o + id3acald + nadp → h + ind3ac + nadph |
| Tyrosine, Tryptophan, and Phenylalanine Metabolism | 1.2.1.3    | R_ALDD20y  | false | aldehydedehydrogenase (indole-3-acetaldehyde, NADP)                   | [c] : h2o + id3acald + nadp → h + ind3ac + nadph |
| Phenylalanine metabolism                           | 1.2.1.3    | R_ALDD19x  | false | aldehydedehydrogenase (phenylacetaldehyde, NAD)                       | [c] : h2o + nad + pacald → h + nadh + pac        |
| Tryptophan metabolism                              | 1.13.11.6  | R_3HAO     | false | _3-hydroxyanthranilate3,4-dioxygenase                                 | [c] : 3hanthr + o2 → cmusa + h                   |
| Tyrosine metabolism                                | 1.13.11.27 | R_34HPPOR  | false | _4-Hydroxyphenylpyruvate:oxygenoxidoreductase                         | [c] : 34hpp + o2 → co2 + hgentis                 |

|                                            |          |           |       |                                                                        |                                                                      |
|--------------------------------------------|----------|-----------|-------|------------------------------------------------------------------------|----------------------------------------------------------------------|
| Valine, Leucine, and Isoleucine Metabolism | 2.6.1.26 | R_VALTA   | true  | valinetransaminase                                                     | [c] : ak <sub>g</sub> + val <sub>l</sub> <=> 3mob + glu <sub>l</sub> |
| Valine, Leucine, and Isoleucine Metabolism | 6.1.1.9  | R_VALTRSm | false | valyl-tRNA <sub>s</sub> ynthetase, mitochondrial                       | [m] : atp + trnaval + val <sub>l</sub> → amp + ppi + valtrna         |
| Valine, Leucine, and Isoleucine Metabolism | 6.1.1.9  | R_VALTRS  | false | Valyl-tRNA <sub>s</sub> ynthetase                                      | [c] : atp + trnaval + val <sub>l</sub> → amp + ppi + valtrna         |
| Valine, Leucine, and Isoleucine Metabolism | 2.6.1.42 | R_OMCDCm  | false | _2-oxo-4-methyl-3-carboxypentanoatedecarboxylation                     | [m] : 3c4mop + h → 4mop + co2                                        |
| Valine, Leucine, and Isoleucine Metabolism | 1.1.1.85 | R_OMCDC   | false | _2-Oxo-4-methyl-3-carboxypentanoatedecarboxylation                     | [c] : 3c4mop + h → 4mop + co2                                        |
| Valine, Leucine, and Isoleucine Metabolism | 6.1.1.4  | R_LEUTRS  | false | Leucyl-tRNA <sub>s</sub> ynthetase                                     | [c] : atp + leu <sub>l</sub> + trnaleu → amp + leutrna + ppi         |
| Valine, Leucine, and Isoleucine Metabolism | 6.1.1.4  | R_LEUTRSm | false | leucyl-tRNA <sub>s</sub> ynthetase, mitochondrial                      | [m] : atp + leu <sub>l</sub> + trnaleu → amp + leutrna + ppi         |
| Valine, Leucine, and Isoleucine Metabolism | 2.6.1.26 | R_LEUTA   | true  | leucinetransaminase                                                    | [c] : ak <sub>g</sub> + leu <sub>l</sub> <=> 4mop + glu <sub>l</sub> |
| Valine, Leucine, and Isoleucine Metabolism | 2.6.1.26 | R_LEUTAm  | true  | leucinetransaminase, mitochondrial                                     | [m] : ak <sub>g</sub> + leu <sub>l</sub> <=> 4mop + glu <sub>l</sub> |
| Valine, Leucine, and Isoleucine Metabolism | 1.1.1.86 | R_KARA1im | false | acetoxyhydroxyacidisomero-reductase, mitochondrial                     | [m] : alac <sub>s</sub> + h + nadph → 23dhmb + nadp                  |
| Valine, Leucine, and Isoleucine Metabolism | 1.1.1.86 | R_KARA2im | false | ketol-acidreductoisomerase (2-Aceto-2-hydroxybutanoate), mitochondrial | [m] : 2ahbut + h + nadph → 23dhmp + nadp                             |
| Valine, Leucine, and Isoleucine Metabolism | 4.1.3.12 | R_IPPSm   | false | _2-isopropylmalatesynthase, mitochondrial                              | [m] : 3mob + accoa + h2o → 3c3hmp + coa + h                          |
| Valine, Leucine, and Isoleucine Metabolism | 4.1.3.12 | R_IPPS    | false | _2-isopropylmalatesynthase                                             | [c] : 3mob + accoa + h2o → 3c3hmp + coa + h                          |
| Valine, Leucine, and Isoleucine Metabolism | 4.2.1.33 | R_IPPMib  | true  | _2-isopropylmalatehydratase                                            | [c] : 2ippm + h2o <=> 3c3hmp                                         |
| Valine, Leucine, and Isoleucine Metabolism | 4.2.1.33 | R_IPPMia  | true  | _3-isopropylmalatedehydratase                                          | [c] : 3c2hmp <=> 2ippm + h2o                                         |
| Valine, Leucine, and Isoleucine Metabolism | 1.1.1.85 | R_IPMD    | false | _3-isopropylmalatede-hydrogenase                                       | [c] : 3c2hmp + nad → 3c4mop + h + nadh                               |
| Valine, Leucine, and Isoleucine Metabolism | 2.6.1.26 | R_ILETA   | true  | isoleucinetransaminase                                                 | [c] : ak <sub>g</sub> + ile <sub>l</sub> <=> 3mop + glu <sub>l</sub> |
| Valine, Leucine, and Isoleucine Metabolism | 2.6.1.26 | R_ILETAm  | true  | isoleucinetransaminase, mitochondrial                                  | [m] : ak <sub>g</sub> + ile <sub>l</sub> <=> 3mop + glu <sub>l</sub> |
| Valine, Leucine, and Isoleucine Metabolism | 6.1.1.5  | R_ILETRSm | false | isoleucyl-tRNA <sub>s</sub> ynthetase, mitochondrial                   | [m] : atp + ile <sub>l</sub> + trnaile → amp + iletrna + ppi         |

|                                            |          |            |       |                                                                              |                                                        |
|--------------------------------------------|----------|------------|-------|------------------------------------------------------------------------------|--------------------------------------------------------|
| Valine, Leucine, and Isoleucine Metabolism | 6.1.1.5  | R_ILETRS   | false | Isoleucyl-tRNA synthetase                                                    | [c] : atp + ile_l + trnaile → amp + iletrna + ppi      |
| Valine, Leucine, and Isoleucine Metabolism | 4.2.1.9  | R_DHAD2m   | false | dihydroxy-aciddehydratase (2, 3-dihydroxy-3-methylpentanoate), mitochondrial | [m] : 23dhmp → 3mop + h2o                              |
| Valine, Leucine, and Isoleucine Metabolism | 4.2.1.9  | R_DHAD1m   | false | dihydroxy-aciddehydratase (2, 3-dihydroxy-3-methylbutanoate), mitochondrial  | [m] : 23dhmb → 3mob + h2o                              |
| Valine, Leucine, and Isoleucine Metabolism | 4.1.3.18 | R_ACLS m   | false | acetolactatesynthase, mitochondrial                                          | [m] : h + 2.0 pyr → alac_s + co2                       |
| Valine, Leucine, and Isoleucine Metabolism | 4.1.3.18 | R_ACHBS m  | false | _2-aceto-2-hydroxybutanoatesynthase, mitochondrial                           | [m] : 2obut + h + pyr → 2ahbut + co2                   |
| Xylose Metabolism                          | 1.-.-.-  | R_XYLR     | false | xylosereductase                                                              | [c] : h + nadph + xyl.d → nadp + xylt                  |
| Xylose Metabolism                          | 1.1.1.9  | R_XYLTD_D  | false | xylitoldehydrogenase (D-xyulose-forming)                                     | [c] : nad + xylt → h + nadh + xylu.d                   |
| Nucleotides                                | 2.7.1.20 | R_ADNK1    | false | adenosinekinase                                                              | [c] : adn + atp → adp + amp + h                        |
| NAD Metabolism                             | 2.4.2.19 | R_NNDPR    | false | nicotinate-nucleotide-diphosphorylase (carboxylating)                        | [c] : 2 h + prpp + quln → co2 + nicrnt + ppi           |
| NAD Biosynthesis                           | 2.4.2.11 | R_NAPRTr   | true  | NAPRTase (rev)                                                               | [c] : h + nac + prpp ⇌ nicrnt + ppi                    |
| NAD Biosynthesis                           | 2.4.2.11 | R_NAPRTm   | false | NAPRTase, mitochondrial                                                      | [m] : h + nac + prpp → nicrnt + ppi                    |
| Cofactor and Prosthetic Group Biosynthesis | 2.4.2.11 | R_NAMNPP   | false | nicotinicacidmono-nucleotidepyrophosphorylase                                | [c] : atp + h2o + nac + prpp → adp + nicrnt + pi + ppi |
| Salvage Pathway                            | 2.4.2.7  | R_ADPT     | false | adeninephosphoribosyl-transferase                                            | [c] : ade + prpp → amp + ppi                           |
| T                                          | 3.5.2.15 | R_UREA     | false | urease                                                                       | [c] : 2 h + h2o + urea → co2 + 2 nh4                   |
| Putative Transporters                      | .        | R_ALLTnt2r | true  | allantointransportinviaprotonsymport                                         | alltn[e] + h[e] ⇌ alltn[c] + h[c]                      |
| Transport, Extracellular                   | .        | R_ADEt     | true  | adeninereversible-transport, cytosol                                         | ade[e] ⇌ ade[c]                                        |
| Transport, Peroxisomal                     | .        | R_NMNt2p   | true  | NMNperoxisomal-transportviaprotonsymport                                     | h[c] + nmn[c] ⇌ h[x] + nmn[x]                          |
| Transport, Peroxisomal                     | .        | R_H2Otp    | true  | NMNperoxisomal-transportviaprotonsymport                                     | h2o[c] ⇌ h2o[x]                                        |
| Transport, Extracellular                   | .        | R_NCAMUP   | false | Nicotinamideaciduptake                                                       | ncam[e] → ncam[c]                                      |

Table S1: Low-Cost Exchange Reactions

|                  |                                                                                                                                                                                                                                                                                                                                                                                                                                                                                                                                                                                                                                                                                                                                                                                                                                                                                                                                                                                                                                                                                                                                                                                                                                                                                                                                                                                                                                                                                                                                                                                                                                                                                                                                                                                                                                                                                                                                                                                                                                                                                                                                                                                                                                                                                                                                                                                                    |
|------------------|----------------------------------------------------------------------------------------------------------------------------------------------------------------------------------------------------------------------------------------------------------------------------------------------------------------------------------------------------------------------------------------------------------------------------------------------------------------------------------------------------------------------------------------------------------------------------------------------------------------------------------------------------------------------------------------------------------------------------------------------------------------------------------------------------------------------------------------------------------------------------------------------------------------------------------------------------------------------------------------------------------------------------------------------------------------------------------------------------------------------------------------------------------------------------------------------------------------------------------------------------------------------------------------------------------------------------------------------------------------------------------------------------------------------------------------------------------------------------------------------------------------------------------------------------------------------------------------------------------------------------------------------------------------------------------------------------------------------------------------------------------------------------------------------------------------------------------------------------------------------------------------------------------------------------------------------------------------------------------------------------------------------------------------------------------------------------------------------------------------------------------------------------------------------------------------------------------------------------------------------------------------------------------------------------------------------------------------------------------------------------------------------------|
| Low-Cost Sources | ala-L <sup>e</sup> , arg-L <sup>e</sup> , asn-L <sup>e</sup> , asp-L <sup>e</sup> , cys-L <sup>e</sup> , gln-L <sup>e</sup> , glu-L <sup>e</sup> , gly <sup>e</sup> , his-L <sup>e</sup> , ile-L <sup>e</sup> , leu-L <sup>e</sup> , lys-L <sup>e</sup> , met-L <sup>e</sup> , phe-L <sup>e</sup> , pro-L <sup>e</sup> , ser-L <sup>e</sup> , thr-L <sup>e</sup> , trp-L <sup>e</sup> , tyr-L <sup>e</sup> , val-L <sup>e</sup> , ade <sup>e</sup> , adn <sup>e</sup> , cytd <sup>e</sup> , csn <sup>e</sup> , gua <sup>e</sup> , gsn <sup>e</sup> , thym <sup>e</sup> , thymd <sup>e</sup> , ura <sup>e</sup> , uri <sup>e</sup> , hxan <sup>e</sup> , xan <sup>e</sup> , ins <sup>e</sup> , a-D-glucose <sup>e</sup> , b-D-glucose <sup>e</sup> , glc-D <sup>e</sup> , rib-D <sup>e</sup> , drib <sup>e</sup> , h2o <sup>e</sup> , co2 <sup>e</sup> , o2 <sup>e</sup> , nh4 <sup>e</sup> , hco3 <sup>e</sup> , pi <sup>e</sup> , fe2 <sup>e</sup> , fe3 <sup>e</sup> , so4 <sup>e</sup> , ni2 <sup>e</sup> , k <sup>e</sup> , na1 <sup>e</sup> , mn2 <sup>e</sup> , cl <sup>e</sup> , cu2 <sup>e</sup> , ca2 <sup>e</sup> , zn2 <sup>e</sup> , mg2 <sup>e</sup> , cd2 <sup>e</sup> , mobd <sup>e</sup> , s <sup>e</sup> , tcynt <sup>e</sup> , urate <sup>e</sup> , orot <sup>e</sup> , ptrc <sup>e</sup> , sprm <sup>e</sup> , spmd <sup>e</sup> , amet <sup>e</sup> , gthrd <sup>e</sup> , inost <sup>e</sup> , chol <sup>e</sup> , orn <sup>e</sup> , pheme <sup>e</sup> , avitel <sup>e</sup> , btn <sup>e</sup> , ascb-L <sup>e</sup> , thm <sup>e</sup> , pydx <sup>e</sup> , pydxn <sup>e</sup> , vitd2 <sup>e</sup> , 4abz <sup>e</sup> , ribflv <sup>e</sup> , retinol <sup>e</sup> , thf <sup>e</sup> , fol <sup>e</sup> , fmn <sup>e</sup> , nmn <sup>e</sup> , ncam <sup>e</sup> , nac <sup>e</sup> , nad <sup>e</sup> , coa <sup>e</sup> , pnto-R <sup>e</sup> , chsterol <sup>e</sup> , ergst <sup>e</sup> , zymst <sup>e</sup> , ac <sup>e</sup> , succ <sup>e</sup> , lac-D <sup>e</sup> , fum <sup>e</sup> , mal-L <sup>e</sup> , lac-L <sup>e</sup> , pyr <sup>e</sup> , fru <sup>e</sup> , strch1 <sup>e</sup> , cellobiose <sup>e</sup> , gal <sup>e</sup> , suc <sup>e</sup> , xyl-D <sup>e</sup> , lcts <sup>e</sup> , xylt <sup>e</sup> , man <sup>e</sup> , arab-D <sup>e</sup> , malt <sup>e</sup> , strch2 <sup>e</sup> , cellulose <sup>e</sup> , malttr <sup>e</sup> |
| Low-Cost Escapes | h2o <sup>e</sup> , co2 <sup>e</sup> , nh4 <sup>e</sup> , hco3 <sup>e</sup> , orot <sup>e</sup> , ac <sup>e</sup> , succ <sup>e</sup> , lac-D <sup>e</sup> , h <sup>e</sup> , fum <sup>e</sup> , mal-L <sup>e</sup> , lac-L <sup>e</sup> , acac <sup>e</sup> , for <sup>e</sup> , acetone <sup>e</sup> , urea <sup>e</sup> , acald <sup>e</sup> , pyr <sup>e</sup> , etoh <sup>e</sup>                                                                                                                                                                                                                                                                                                                                                                                                                                                                                                                                                                                                                                                                                                                                                                                                                                                                                                                                                                                                                                                                                                                                                                                                                                                                                                                                                                                                                                                                                                                                                                                                                                                                                                                                                                                                                                                                                                                                                                                                              |

Table S2: Results of First Round of FBA-Gap

| Organism | $ R $ | $ M $ | Minimum Biomass | Sources Selected                                                                                                                   | Escapes Selected                              | Biomass Flux | Notes         |
|----------|-------|-------|-----------------|------------------------------------------------------------------------------------------------------------------------------------|-----------------------------------------------|--------------|---------------|
| bsu      | 1251  | 1224  | 0.5             | $P_i^e$ , $Ca_2^e$ , $Mg_2^e$ , $Cys-L^e$ , $Fe_3^e$ , $Malttr^e$ , $K^e$ , $O_2^e$ , $NH_4^e$                                     | Lac- $L^e$                                    | 0.5          | cost: 10.0    |
| T. cruzi | 112   | 130   | 0.5             | b-D-glucose $^e$ , Glu- $L^e$ , Asp- $L^e$ , $P_i^e$                                                                               | Succinate $^e$ , H $^e$ , $NH_4^e$            | 0.5          | cost: 7.0     |
| hpy      | 552   | 563   | 0.5             | Ile- $L^e$ , Val- $L^e$ , Cys- $L^e$ , $O_2^e$ , Ala- $L^e$ , Met- $L^e$ , His- $L^e$ , Leu- $L^e$ , $P_i^e$ , Gly $^e$ , Orn $^e$ | $CO_2^e$ , Lac- $L^e$ , $NH_4^e$ , rhcys $^c$ | 0.5          | cost: 18214.0 |
| ecoli    | 1075  | 908   | 0.5             | Cytd $^e$ , $O_2^e$ , Cys- $L^e$                                                                                                   | Clpn_EC $^c$ , Lac-d $^e$ , Ura $^e$          | 18.0         | cost: 12925.0 |
| crypto   | 576   | 712   | 0.5             | AMP $^c$ , NADP $^c$ , Asp- $L^e$ , AcCoA $^c$ , s17bp $^c$ , $SO_4^e$ , Ser- $L^e$ , Pyr $^e$ , Gln- $L^e$                        | $CO_2^e$ , Ala- $L^e$                         | 6.2          | cost: 526.0   |

Table S3: Metabolites that are distance  $\infty$  from biomass reaction for *C. neoformans*

|            |                                                                                                                                                                                                                                                                                                                                                                                                                                                                                                                                                                                                                                                                                                                                                                                                                                                                                                                                                                                                                                                                                                                                                                                                                                                                                                                                                                                                                                                                                                                                                                                                                                                                                                                                                                                                                                                                                                                                                                                                                                                                                                                                                                                                                                                                                                                                                                                                                                                                                                                                                                                                                                                                                                                                                                                                                                                                                                                                                                                                                                                                                                                                                                                                                                                                                                                                                                                                                                                                                                                                                                                     |
|------------|-------------------------------------------------------------------------------------------------------------------------------------------------------------------------------------------------------------------------------------------------------------------------------------------------------------------------------------------------------------------------------------------------------------------------------------------------------------------------------------------------------------------------------------------------------------------------------------------------------------------------------------------------------------------------------------------------------------------------------------------------------------------------------------------------------------------------------------------------------------------------------------------------------------------------------------------------------------------------------------------------------------------------------------------------------------------------------------------------------------------------------------------------------------------------------------------------------------------------------------------------------------------------------------------------------------------------------------------------------------------------------------------------------------------------------------------------------------------------------------------------------------------------------------------------------------------------------------------------------------------------------------------------------------------------------------------------------------------------------------------------------------------------------------------------------------------------------------------------------------------------------------------------------------------------------------------------------------------------------------------------------------------------------------------------------------------------------------------------------------------------------------------------------------------------------------------------------------------------------------------------------------------------------------------------------------------------------------------------------------------------------------------------------------------------------------------------------------------------------------------------------------------------------------------------------------------------------------------------------------------------------------------------------------------------------------------------------------------------------------------------------------------------------------------------------------------------------------------------------------------------------------------------------------------------------------------------------------------------------------------------------------------------------------------------------------------------------------------------------------------------------------------------------------------------------------------------------------------------------------------------------------------------------------------------------------------------------------------------------------------------------------------------------------------------------------------------------------------------------------------------------------------------------------------------------------------------------------|
| NotSources | <p>13bdgln<sup>c</sup>, 2dr5p<sup>c</sup>, 2omhmb1.5<sup>m</sup>, 2ommb1.5<sup>m</sup>, 3ophb.5<sup>c</sup>, 3ophb.5<sup>m</sup>, 4aabutn<sup>c</sup>, 4adcho<sup>c</sup>, 4gudbutn<sup>c</sup>, 4h2oglt<sup>c</sup>, 4h2oglt<sup>m</sup>, 4h2oglt<sup>x</sup>, 4hpro.lt<sup>c</sup>, 4hthr<sup>c</sup>, 5aop<sup>m</sup>, 5aprbu<sup>c</sup>, 5fthf<sup>m</sup>, 5mta<sup>c</sup>, abt<sup>c</sup>, acac<sup>c</sup>, acoa<sup>x</sup>, acrn<sup>x</sup>, ade<sup>c</sup>, adp<sup>v</sup>, ahdt<sup>c</sup>, alatrna<sup>c</sup>, amp<sup>x</sup>, amuco<sup>c</sup>, apep<sup>c</sup>, argtrna<sup>c</sup>, argtrna<sup>m</sup>, asntrna<sup>c</sup>, asntrna<sup>m</sup>, asptrna<sup>c</sup>, asptrna<sup>m</sup>, atp<sup>v</sup>, cgly<sup>c</sup>, chitos<sup>c</sup>, cholp<sup>c</sup>, cit<sup>x</sup>, clpn.sc<sup>m</sup>, cmaphis<sup>c</sup>, co2<sup>g</sup>, co2<sup>v</sup>, co2<sup>x</sup>, coa<sup>n</sup>, crn<sup>c</sup>, crn<sup>e</sup>, cystrna<sup>c</sup>, damp<sup>c</sup>, dara14lac<sup>c</sup>, dhf<sup>c</sup>, dhnpt<sup>c</sup>, dolmanp<sup>r</sup>, dolp<sup>r</sup>, dtmp<sup>c</sup>, duri<sup>c</sup>, ethamp<sup>c</sup>, fgam<sup>c</sup>, fmettrna<sup>m</sup>, fmn<sup>c</sup>, gam6p<sup>c</sup>, gdp<sup>g</sup>, gdpmann<sup>c</sup>, gdpmann<sup>g</sup>, glntrna<sup>c</sup>, gluala<sup>c</sup>, glutrna<sup>c</sup>, glutrna<sup>m</sup>, glytrna<sup>c</sup>, gthrd<sup>m</sup>, h2o<sup>v</sup>, h<sup>g</sup>, h<sup>r</sup>, h<sup>v</sup>, hcit<sup>n</sup>, histrna<sup>c</sup>, histrna<sup>m</sup>, hmbil<sup>c</sup>, hpglu<sup>c</sup>, iletrna<sup>c</sup>, iletrna<sup>m</sup>, ind3ac<sup>c</sup>, ind3ac<sup>m</sup>, inost<sup>c</sup>, lac.d<sup>c</sup>, leutrna<sup>c</sup>, leutrna<sup>m</sup>, lystrna<sup>c</sup>, lystrna<sup>m</sup>, m2macchitppdol<sup>g</sup>, m3macchitppdol<sup>g</sup>, m4macchitppdol<sup>g</sup>, mannan<sup>r</sup>, mettrna<sup>c</sup>, mi145p<sup>c</sup>, milp.d<sup>c</sup>, nadph<sup>x</sup>, nh4<sup>e</sup>, nh4<sup>x</sup>, nm<sup>x</sup>, npmehis<sup>c</sup>, pac<sup>c</sup>, pant-r<sup>m</sup>, paps<sup>c</sup>, pc.sc<sup>c</sup>, pe.sc<sup>g</sup>, pe.sc<sup>m</sup>, pe.sc<sup>v</sup>, phetrna<sup>c</sup>, phetrna<sup>m</sup>, pi<sup>v</sup>, ppi<sup>x</sup>, pppg9<sup>c</sup>, pram<sup>c</sup>, protrna<sup>c</sup>, ps.sc<sup>g</sup>, ps.sc<sup>v</sup>, ptd3ino.sc<sup>c</sup>, ptd4ino.sc<sup>c</sup>, ptd4ino.sc<sup>n</sup>, pyr<sup>x</sup>, ribflv<sup>e</sup>, sertrna<sup>c</sup>, spmd<sup>c</sup>, srb.l<sup>c</sup>, tglp<sup>c</sup>, thm<sup>c</sup>, thmmp<sup>c</sup>, thrtrna<sup>c</sup>, thrtrna<sup>m</sup>, trdrd<sup>c</sup>, trptrna<sup>c</sup>, trptrna<sup>m</sup>, tyrtrna<sup>c</sup>, tyrtrna<sup>m</sup>, valtrna<sup>c</sup>, valtrna<sup>m</sup>, xylu.d<sup>c</sup></p>                                                                                                                                                                                                                                                                                                                                                                                                                                                                                                                                                                                                                                                                                                                                       |
| NotEscapes | <p>10fthf<sup>m</sup>, 13bdgln<sup>e</sup>, 1ag3p.sc<sup>c</sup>, 1p3h5c<sup>c</sup>, 25dhpp<sup>c</sup>, 2dhp<sup>m</sup>, 2omhmb1.5<sup>m</sup>, 2ommb1.5<sup>m</sup>, 35ccmp<sup>c</sup>, 35cdamp<sup>c</sup>, 35cgmp<sup>c</sup>, 35cimp<sup>c</sup>, 3ophb.5<sup>m</sup>, 4abut<sup>e</sup>, 4abutn<sup>c</sup>, 4abutn<sup>m</sup>, 4ahmmp<sup>c</sup>, 4gudbd<sup>c</sup>, 4hbz<sup>m</sup>, 4hpro.lt<sup>m</sup>, 4mhetz<sup>c</sup>, 5aop<sup>e</sup>, 5mthf<sup>c</sup>, 6dg<sup>c</sup>, ac<sup>x</sup>, acald<sup>m</sup>, accoa<sup>n</sup>, acrn<sup>c</sup>, acybut<sup>c</sup>, adp<sup>v</sup>, akgn<sup>n</sup>, ala-b<sup>c</sup>, alltn<sup>e</sup>, alltt<sup>e</sup>, amet<sup>e</sup>, apropc<sup>c</sup>, arab-d<sup>c</sup>, arab-l<sup>c</sup>, asp-l<sup>n</sup>, atp<sup>x</sup>, btn<sup>e</sup>, caphis<sup>c</sup>, cdpchol<sup>c</sup>, ch4s<sup>c</sup>, chol<sup>c</sup>, co2<sup>g</sup>, co2<sup>x</sup>, crn<sup>x</sup>, csn<sup>e</sup>, cytd<sup>c</sup>, dagpy.sc<sup>c</sup>, dcacoa<sup>c</sup>, dcyt<sup>c</sup>, ddcacoa<sup>c</sup>, dhpmp<sup>c</sup>, dolmanp<sup>r</sup>, dolp<sup>r</sup>, drib<sup>c</sup>, e4hglu<sup>c</sup>, e4hglu<sup>x</sup>, etha<sup>c</sup>, fad<sup>c</sup>, fmn<sup>c</sup>, fmn<sup>e</sup>, fmn<sup>m</sup>, fru<sup>e</sup>, gal<sup>e</sup>, gar<sup>c</sup>, gdp<sup>g</sup>, gdpmann<sup>g</sup>, gld<sup>e</sup>, glp<sup>c</sup>, glx<sup>x</sup>, gsn<sup>c</sup>, gthox<sup>e</sup>, h2o<sup>e</sup>, h2o<sup>x</sup>, h2s<sup>c</sup>, h<sup>g</sup>, h<sup>r</sup>, hdcoa<sup>c</sup>, hxan<sup>c</sup>, iad<sup>c</sup>, icit<sup>x</sup>, id3acald<sup>m</sup>, ind3acnl<sup>c</sup>, inost<sup>e</sup>, lgt.s<sup>m</sup>, lys-l<sup>m</sup>, m2macchitppdol<sup>g</sup>, m3macchitppdol<sup>g</sup>, m4macchitppdol<sup>g</sup>, malt<sup>e</sup>, man<sup>e</sup>, mannan<sup>r</sup>, methf<sup>m</sup>, mhpglu<sup>c</sup>, mthgxl<sup>c</sup>, n4abutn<sup>c</sup>, nadp<sup>x</sup>, nadph<sup>x</sup>, nicrnt<sup>c</sup>, nicrnt<sup>m</sup>, nm<sup>n</sup>, nm<sup>m</sup>, o2<sup>m</sup>, ocdycacoa<sup>c</sup>, octdp.5<sup>c</sup>, octdp.5<sup>m</sup>, odecoa<sup>c</sup>, pacald<sup>c</sup>, pad<sup>c</sup>, pant-r<sup>c</sup>, pap<sup>c</sup>, pe.sc<sup>g</sup>, pepd<sup>c</sup>, pg.sc<sup>m</sup>, phthr<sup>c</sup>, pi<sup>v</sup>, pmtcoa<sup>c</sup>, ps.sc<sup>g</sup>, ps.sc<sup>v</sup>, ptd145bp.sc<sup>c</sup>, ptd1ino.sc<sup>c</sup>, ptd1ino.sc<sup>n</sup>, pyr<sup>e</sup>, ribflv<sup>e</sup>, sbt-l<sup>c</sup>, so4<sup>c</sup>, so4<sup>e</sup>, stcoa<sup>c</sup>, suc<sup>e</sup>, tdcoca<sup>c</sup>, tglp<sup>c</sup>, thm<sup>e</sup>, thmmp<sup>e</sup>, thmpp<sup>e</sup>, trdox<sup>c</sup>, trnaala<sup>c</sup>, trnaarg<sup>c</sup>, trnaarg<sup>m</sup>, trnaasn<sup>c</sup>, trnaasn<sup>m</sup>, trnaasp<sup>c</sup>, trnaasp<sup>m</sup>, trnacys<sup>c</sup>, trnagln<sup>c</sup>, trnaglu<sup>c</sup>, trnaglu<sup>m</sup>, trnagly<sup>c</sup>, trnahis<sup>c</sup>, trnahis<sup>m</sup>, trnaile<sup>c</sup>, trnaile<sup>m</sup>, trnaleu<sup>c</sup>, trnaleu<sup>m</sup>, trnalys<sup>c</sup>, trnalys<sup>m</sup>, trnamet<sup>c</sup>, trnamet<sup>m</sup>, trnaphe<sup>c</sup>, trnaphe<sup>m</sup>, trnapro<sup>c</sup>, trnaser<sup>c</sup>, trnathr<sup>c</sup>, trnathr<sup>m</sup>, trnatrp<sup>c</sup>, trnatrp<sup>m</sup>, trnatyr<sup>c</sup>, trnatyr<sup>m</sup>, trnaval<sup>c</sup>, trnaval<sup>m</sup>, uppg3<sup>c</sup>, ura<sup>e</sup>, uri<sup>e</sup>, xan<sup>c</sup>, xyl-d<sup>c</sup></p> |



Table S4: Round 1 of Gap Analysis for *C. neoformans*

| Metabolite          | Source/Escape | Reactions Added                       |
|---------------------|---------------|---------------------------------------|
| coa <sup>c</sup>    | source        | None                                  |
| arg-1 <sup>e</sup>  | source        | None                                  |
| gln-1 <sup>e</sup>  | source        | None                                  |
| gly <sup>e</sup>    | source        | None                                  |
| pyr <sup>e</sup>    | source        | None                                  |
| nicrnt <sup>c</sup> | source        | R_NNDPR, R_NAPRTr, R_NAPRTm, R_NAMNPP |
| camp <sup>c</sup>   | source        | added R_ADNK1                         |
| asp-1 <sup>e</sup>  | source        | None                                  |
| so4 <sup>e</sup>    | source        | None                                  |
| ade <sup>c</sup>    | escape        | R_ADPT, R_ADEt                        |
| alltn <sup>c</sup>  | escape        | R_ALLNt2r                             |
| h <sup>e</sup>      | escape        | None                                  |
| pro-1 <sup>e</sup>  | escape        | None                                  |
| urea <sup>e</sup>   | escape        | R_UREA                                |
| ala-1 <sup>e</sup>  | escape        | None                                  |

Table S5: Round 2 of Gap Analysis for *C. neoformans*

| Metabolite          | Source/Escape | Reactions added   |
|---------------------|---------------|-------------------|
| amet <sup>e</sup>   | source        | None              |
| coa <sup>c</sup>    | source        | None              |
| pi <sup>e</sup>     | source        | None              |
| asn-1 <sup>e</sup>  | source        | None              |
| gln-1 <sup>e</sup>  | source        | None              |
| gly <sup>e</sup>    | source        | None              |
| urea <sup>e</sup>   | source        | None              |
| pyr <sup>e</sup>    | source        | None              |
| nmn <sup>c</sup>    | source        | R_NMNt2p, R_H2Otp |
| so4 <sup>e</sup>    | source        | None              |
| met-1 <sup>e</sup>  | escape        | None              |
| ade <sup>e</sup>    | escape        | None              |
| allttn <sup>e</sup> | escape        | None              |
| ala-1 <sup>e</sup>  | escape        | None              |
| asp-1 <sup>e</sup>  | escape        | None              |

Table S6: Round 3 of Gap Analysis for *C. neoformans*

| Metabolite          | Source/Escape | Reactions added |
|---------------------|---------------|-----------------|
| amet <sup>e</sup>   | source        | None            |
| coa <sup>c</sup>    | source        | None            |
| pi <sup>e</sup>     | source        | None            |
| asn-l <sup>e</sup>  | source        | None            |
| gln-l <sup>e</sup>  | source        | None            |
| gly <sup>e</sup>    | source        | None            |
| urea <sup>e</sup>   | source        | None            |
| pyr <sup>e</sup>    | source        | None            |
| so4 <sup>e</sup>    | source        | None            |
| dnad <sup>c</sup>   | source        | R_NCAMUP        |
| met-l <sup>e</sup>  | escape        | None            |
| ade <sup>e</sup>    | escape        | None            |
| allttn <sup>e</sup> | escape        | None            |
| ala-l <sup>e</sup>  | escape        | None            |
| asp-l <sup>e</sup>  | escape        | None            |

Table S7: Round 4 of Gap Analysis for *C. neoformans*

| Metabolite          | Source/Escape | Reactions added |
|---------------------|---------------|-----------------|
| amet <sup>e</sup>   | source        | None            |
| coa <sup>c</sup>    | source        | None            |
| pi <sup>e</sup>     | source        | None            |
| arg-l <sup>e</sup>  | source        | None            |
| gln-l <sup>e</sup>  | source        | None            |
| gly <sup>e</sup>    | source        | None            |
| pyr <sup>e</sup>    | source        | None            |
| ncam <sup>e</sup>   | source        | None            |
| asp-l <sup>e</sup>  | source        | None            |
| so4 <sup>e</sup>    | source        | None            |
| met-l <sup>e</sup>  | escape        | None            |
| ade <sup>e</sup>    | escape        | None            |
| allttn <sup>e</sup> | escape        | None            |
| h <sup>e</sup>      | escape        | None            |
| pro-l <sup>e</sup>  | escape        | None            |
| urea <sup>e</sup>   | escape        | None            |
| ala-l <sup>e</sup>  | escape        | None            |
